NLRP3 activation by TKIs

# 1 Tyrosine kinase inhibitors trigger lysosomal damage-associated cell lysis to 2 activate the NLRP3 inflammasome

## 3 Authors:

4 Emilia Neuwirt<sup>1,2,3,§</sup>, Giovanni Magnani<sup>4,§</sup>, Tamara Čiković<sup>4,5,#</sup>, Anna Kostina<sup>1,#</sup>, Svenja  
5 Wöhrle<sup>1,3,#</sup>, Stephan Flemming<sup>6</sup>, Larissa Fischer<sup>1,3</sup>, Nora J. Fischenich<sup>1</sup>, Benedikt S. Saller<sup>1,3</sup>,  
6 Oliver Gorka<sup>1</sup>, Steffen Renner<sup>7</sup>, Claudia Agarinis<sup>7</sup>, Christian Parker<sup>7</sup>, Andreas Boettcher<sup>7</sup>,  
7 Christopher J. Farady<sup>7</sup>, Rolf Backofen<sup>2,6</sup>, Marta Rodriguez-Franco<sup>8</sup>, Martina Tholen<sup>9</sup>, Thomas  
8 Reinheckel<sup>2,9,10</sup>, Thomas Ott<sup>2,8</sup>, Christina J. Groß<sup>2</sup>, Philipp J. Jost<sup>6,10,11,12</sup>, and Olaf Groß<sup>1,2,13,\*</sup>

## 9 Affiliations:

10 <sup>1</sup> Institute of Neuropathology, Medical Center – University of Freiburg, Faculty of Medicine,  
11 University of Freiburg, 79106 Freiburg, Germany

12 <sup>2</sup> Signalling Research Centres BIOS and CIBSS, University of Freiburg, 79104 Freiburg,  
13 Germany

14 <sup>3</sup> Faculty of Biology, University of Freiburg, 79104 Freiburg, Germany

15 <sup>4</sup> Institute of Clinical Chemistry and Pathobiochemistry, Klinikum rechts der Isar, Technical  
16 University of Munich, 81675 Munich, Germany

17 <sup>5</sup> Center for Translational Cancer Research (TranslaTUM), Technical University of Munich,  
18 81675 Munich, Germany

19 <sup>6</sup> Bioinformatics Group, Faculty of Engineering, University of Freiburg, 79110 Freiburg,  
20 Germany

21 <sup>7</sup> Novartis Institutes for BioMedical Research, 4056 Basel, Switzerland

22 <sup>8</sup> Faculty of Biology, Cell Biology, University of Freiburg, 79104 Freiburg, Germany

23 <sup>9</sup> Institute for Molecular Medicine and Cell Research, Faculty of Medicine, University of  
24 Freiburg, 79104 Freiburg, Germany

25 <sup>10</sup> German Cancer Consortium (DKTK), German Cancer Research Center (DKFZ), 69120  
26 Heidelberg, Germany

NLRP3 activation by TKIs

27 <sup>11</sup> Department of Medicine III, Klinikum rechts der Isar, Technical University of Munich,  
28 81675 Munich, Germany

29 <sup>12</sup> Division of Clinical Oncology, Department of Medicine, Medical University of Graz, 8036  
30 Graz, Austria

31 <sup>13</sup> Center for Basics in NeuroModulation (NeuroModulBasics), Faculty of Medicine,  
32 University of Freiburg, 79106 Freiburg, Germany

33 § Shared first authors

34 # These authors contributed equally

35 \* Correspondence: [olaf.gross@uniklinik-freiburg.de](mailto:olaf.gross@uniklinik-freiburg.de)

36 **One Sentence Summary:**

37 A functional small molecule screen identifies imatinib, masitinib and other tyrosine kinase  
38 inhibitors that destabilize myeloid cell lysosomes, leading to cell lysis and K<sup>+</sup> efflux-dependent  
39 NLRP3 inflammasome activation.

40 **Abstract:**

41 Inflammasomes are intracellular protein complexes that control proteolytic maturation and  
42 secretion of inflammatory interleukin-1 (IL-1) family cytokines and are thus important in host  
43 defense. While some inflammasomes are activated simply by binding to pathogen-derived  
44 molecules, others, including those nucleated by NLRP3 and NLRP1, have more complex  
45 activation mechanisms that are not fully understood. We screened a library of small molecules  
46 to identify new inflammasome activators that might shed light on activation mechanisms. In  
47 addition to validating dipeptidyl peptidase (DPP) inhibitors as NLRP1 activators, we find that  
48 clinical tyrosine kinase inhibitors (TKIs) including imatinib and masitinib activate the NLRP3  
49 inflammasome. Mechanistically, these TKIs cause lysosomal swelling and damage, leading to  
50 cathepsin-mediated destabilization of myeloid cell membranes and cell lysis. This is  
51 accompanied by potassium (K<sup>+</sup>) efflux, which activates NLRP3. Both lytic cell death and

## NLRP3 activation by TKIs

52 NLRP3 activation but not lysosomal damage induced by TKIs are prevented by the  
53 cytoprotectant high molecular weight polyethylene glycol (PEG). Our study establishes a  
54 screening method that can be expanded for inflammasome research and immunostimulatory  
55 drug development, and provides new insight into immunological off-targets that may  
56 contribute to efficacy or adverse effects of TKIs.

## 57 **Main Text:**

### 58 **Introduction**

59 Inflammasomes are intracellular danger-sensing complexes that couple the detection of  
60 pathogen-derived molecules and other danger signals to the secretion of mature IL-1 family  
61 cytokines and to a form of lytic cell death termed pyroptosis (1, 2). They are typically found in  
62 myeloid cells of the innate immune system and are important for host defense against infection,  
63 but are also implicated in deleterious inflammatory responses in numerous diseases (3).  
64 Minimally, they consist of an oligomerized sensor moiety (often a protein of the NOD-like  
65 receptor [NLR] family) connected to the protease caspase-1, usually via a large oligomeric  
66 complex consisting of the adaptor protein ASC (4, 5). Following its activation at the  
67 inflammasome, caspase-1 cleaves not only pro-IL-1 $\beta$  and pro-IL-18 to produce the active  
68 cytokines, but also the pore-forming protein gasdermin D (GSDMD) that mediates IL-1 release  
69 and executes pyroptosis (6). Like other lytic cell death modalities such as necroptosis,  
70 pyroptosis involves osmotic cell swelling (7) and loss of plasma membrane integrity, and also  
71 leads to the release of the cellular contents including damage-associated molecular patterns and  
72 alarmins that add their immunostimulatory potential to that of IL-1 cytokines (8).

73 Several inflammasomes are activated by direct binding of a pathogen-derived ligand in the  
74 cytoplasm: for instance, the NAIP/NLRC4 inflammasomes detects bacterial secretion system  
75 components or flagellin (9) and the AIM2 inflammasome binds cytoplasmic dsDNA (10).

## NLRP3 activation by TKIs

76 Experimentally, precision activation of these inflammasomes can be achieved simply by  
77 transfecting the aforementioned ligands. Other inflammasomes sense pathogen activity  
78 indirectly and are therefore more challenging to activate specifically. NLRP1 paralogs are  
79 hypothesized to detect pathogens by acting as decoy substrates for pathogen-derived enzymes  
80 such as proteases or E3 ubiquitin ligases that target NLRP1 for partial proteasomal degradation,  
81 thereby relieving the remaining portion from auto-inhibition (11). Pyrin (encoded by *Mefv*) is  
82 kept inactive by phosphorylation mediated by homeostatic Rho GTPase signalling; it is  
83 triggered by pathogen effectors that suppress RhoA activity, leading to its dephosphorylation  
84 and activation (12).

85 The NLRP3 inflammasome is unique in that it has a myriad of structurally diverse activators  
86 of exogenous and endogenous origin, and in that its precise mechanism of activation is not well  
87 understood (13). Since its discovery as a gene mutated in hereditary fever syndromes, NLRP3  
88 has been implicated in numerous acquired diseases and inflammatory conditions (3).  
89 Consistent with its role in inflammatory diseases, NLRP3 is activated by endogenous danger  
90 signals produced during tissue damage (e.g. extracellular ATP) or metabolic deregulation and  
91 excess (e.g. saturated fatty acids, or crystals of monosodium urate [MSU], oxalate or  
92 cholesterol) (14). Furthermore, the ability of NLRP3 to respond to environmental irritants  
93 explains its pathogenic role in asbestosis, silicosis and contact hypersensitivity. NLRP3 can  
94 also be activated by pore-forming toxins such as nigericin, as well as certain pathogens (15)  
95 and small molecules (16). None of the numerous structurally unrelated NLRP3 activators are  
96 known to act as direct ligands, although they have common effects on the cell, which in turn  
97 appear to be involved in NLRP3 activation. These include potassium ( $K^+$ ) efflux (17, 18),  
98 metabolic dysregulation and mitochondrial ROS production (14, 16), and disturbance of  
99 intracellular membranous compartments such as the lysosome (19, 20).



## NLRP3 activation by TKIs

100 Efforts to discover small molecule modulators of the inflammasome have primarily focused on  
101 identification of inhibitors (21-23), though some have also identified new activators (24). Small  
102 molecule activators of NLRP1, pyrin and NLRP3 would simplify the study of these  
103 inflammasomes and, particularly in the case of NLRP3, might yield fundamental insight into  
104 activation mechanisms. For instance, our previous investigation dissecting the mechanism of  
105 NLRP3 activation by imiquimod (R837) and related imidazoquinolines revealed that K<sup>+</sup> efflux  
106 is not a universal requirement for NLRP3 activation (16). Furthermore, while studies  
107 performed in gene-deficient mice have implicated inflammasomes in several inflammatory  
108 diseases and in host defense, less is known about the drugs that activate the inflammasome and,  
109 by extension, the therapeutic settings in which inflammasomes might play a role in either  
110 efficacy or side effects of a given drug. In addition, specific novel small molecule activators of  
111 inflammasomes have therapeutic potential as immunostimulatory drugs, for instance in the  
112 context of cancer therapy or vaccination since the established inflammasome activators have  
113 pleiotropic effects or are not suitable in a therapeutic setting.

114 We therefore screened a library of small molecules including known drugs for their ability to  
115 activate the inflammasome. We identified Val-boro-Pro as an activator of the NLRP1  
116 inflammasome, which is in line with other recent studies (25-29). Furthermore, we identified  
117 the TKIs imatinib (Glivec™, Gleevec™) and the structurally-related masitinib (Masivet™) as  
118 novel activators of the NLRP3 inflammasome. Specifically in myeloid cells, imatinib and  
119 masitinib triggered lysosomal swelling and damage, and subsequent plasma membrane  
120 destabilization and ballooning, ultimately resulting in cell lysis and K<sup>+</sup> efflux to activate  
121 NLRP3. Stabilizing the cell membrane with the cytoprotectant high molecular weight PEG  
122 blocked NLRP3 inflammasome activation by imatinib and masitinib and also by MSU as a  
123 crystalline activator of the lysosomal NLRP3 activation pathway (19, 30). Other clinically  
124 approved antineoplastic TKIs such as bosutinib (Bosulif™) and crizotinib (Xalkori™) also

## NLRP3 activation by TKIs

125 triggered NLRP3 activation in a similar fashion in murine and human myeloid cells, suggesting  
126 this may be a common feature of this family of drugs with potential relevance in the therapeutic  
127 setting.

## 128 **Results**

### 129 *Small molecule screen for inflammasome activators*

130 To identify new small molecule inflammasome activators, we designed a two-step screening  
131 strategy employing loss of cell viability (utilizing a luciferase-based assay which monitors  
132 reduction in cellular ATP levels) and IL-1 $\beta$  secretion as primary and secondary end-points,  
133 respectively (**Fig. 1A**). The screen was performed in a 384-well format using  
134 lipopolysaccharide (LPS)-primed primary murine bone marrow-derived dendritic cells  
135 (BMDCs), as they display robust and rapid inflammasome activation (31, 32). Nigericin is an  
136 established NLRP3 activator and was used as the positive control. We screened a library of  
137 2256 small molecules that included cytostatic agents and signal transduction inhibitors, as well  
138 as other established pharmaceuticals, candidate drugs and research compounds for which at  
139 least some indication for a mode of action exists (33). When we tested at a concentration of 50  
140  $\mu$ M, 21% of the compounds reduced cell viability by at least 50% (**Fig. 1B**). To identify the  
141 inflammasome activators among these compounds, we performed a secondary screen using the  
142 same experimental conditions and a FRET-based assay that detects the cleaved and released  
143 form of IL-1 $\beta$  (34). A total of 98 compounds induced the release of at least 50% of the amount  
144 of IL-1 $\beta$  induced by nigericin (**Fig. 1C**). As compared to the composition of the library, we  
145 found that compounds targeting proteases and kinases formed the largest groups among the  
146 hits. Furthermore, compounds targeting kinases were enriched 2.7-fold amongst the hits as  
147 compared to the complete library (**Fig. 1D**). We selected compounds from these categories for

## NLRP3 activation by TKIs

148 in-depth analysis (see **Supplementary Table 1** for structures and trade names of the drugs  
149 analyzed throughout this study).

### 150 *Inflammasome activation by dipeptidyl peptidase inhibitors*

151 Among the strongest inducers of IL-1 $\beta$  secretion identified in the screen was Val-boro-Pro  
152 (VbP, also known as talabostat, PT-1000) (**Fig. 1C**), an antineoplastic candidate drug that  
153 inhibits dipeptidyl peptidases (DPPs) (25). VbP triggered substantial maturation and release of  
154 IL-1 $\beta$ , as well as lytic cell death as measured by release of lactate dehydrogenase (LDH)  
155 (**Supplementary Fig. 1A-C**). This was accompanied by cleavage of the inflammasome  
156 effector protease caspase-1 and its pore-forming substrate GSDMD (**Supplementary Fig. 1C**),  
157 as well as formation of ASC ‘specks’ as visualized by immunofluorescence staining and  
158 confocal microscopy (**Supplementary Fig. 1D**). Together, these findings suggest the  
159 activation of an inflammasome. Similar results were observed with 1G244, another screening  
160 hit that inhibits DPP8 and DPP9 with greater specificity than VbP (25) (**Fig. 1A-D**).

161 To gain insight into which inflammasome was activated by the DPP inhibitors, we analyzed  
162 cells deficient in ASC (encoded by *Pycard*). Release of mature IL-1 $\beta$  as well as cleavage of  
163 caspase-1 were dependent on ASC (**Supplementary Fig. 1A, C**). However, in contrast to what  
164 was observed with the control NLRP3 activator nigericin, significant GSDMD processing  
165 (**Supplementary Fig. 1C**) and pyroptotic cell death (**Supplementary Fig. 1B**) were still  
166 observed in the absence of ASC but not in the absence of caspase-1. This suggested that the  
167 DPP inhibitors activate an inflammasome-nucleating receptor such as NLRP1 or NLRC4 that  
168 contain a caspase recruitment domain (CARD) and can thereby directly engage caspase-1 for  
169 partial activation in the absence of ASC (1, 35). In contrast to other inflammasome-nucleating  
170 proteins, NLRP1 activation requires its partial degradation by the proteasome, releasing its C-  
171 terminus from auto-inhibition (36). The proteasome inhibitor MG132 blocked IL-1 $\beta$  release

## NLRP3 activation by TKIs

172 induced by VbP and 1G244, but not by the NLRP3 inflammasome activator nigericin, or the  
173 AIM2 inflammasome activator poly(dA:dT), in line with recent reports that DPP inhibitors  
174 activate the NLRP1 inflammasome (25-29) (**Supplementary Fig. 1E**). Cells from C57BL/6  
175 mice are insensitive to NLRP1 activation by the established stimulus Anthrax lethal toxin that  
176 in mice triggers only the NLRP1b paralog absent in this strain (27). Therefore, the markedly  
177 enhanced sensitivity to VbP observed in cells from BALB/c mice is consistent with NLRP1  
178 activation (**Supplementary Fig. 1F**) but suggests that DPP inhibitors activate NLRP1b and at  
179 least one other NLRP1 paralog, which is consistent with other studies (25-29). These studies  
180 also report that the ability of this class of compounds to activate the inflammasome is related  
181 to their inhibition of both DPP8 and DPP9 and a direct DPP interaction with NLRP1, which is  
182 consistent with our observation that the DPP4 inhibitor alogliptin did not trigger inflammasome  
183 activation (**Supplementary Fig. 1G**). The identification of DPP inhibitors by our screen  
184 demonstrates that our screening strategy is suitable for discovery of new small molecule  
185 inflammasome activators.

### 186 *Imatinib and masitinib activate the NLRP3 inflammasome*

187 Interestingly, the antineoplastic tyrosine kinase inhibitor (TKI) masitinib was among the  
188 compounds that most strongly reduced ATP levels (*i.e.* BMDC viability) in the primary screen,  
189 and also induced IL-1 $\beta$  release in the secondary screen (**Fig. 1B, C**). We also tested the  
190 prototypic TKI imatinib, which is structurally similar to masitinib (**Supplementary Table 1**),  
191 and found that both compounds induced IL-1 $\beta$  and also triggered caspase-1 cleavage and  
192 formation of ASC specks (**Fig. 2A, B** and **Supplementary Fig. 2A-E**). The approximate  
193 minimum dose and duration required for strong IL-1 $\beta$  secretion (*i.e.* comparable to established  
194 inflammasome activators) were 20  $\mu$ M and 2-3 h, respectively (**Supplementary Fig. 2A, B**).  
195 Release of mature IL-1 $\beta$  and cleavage of caspase-1 and GSDMD in response to imatinib and  
196 masitinib were strongly reduced in the absence of NLRP3 in BMDCs (**Fig. 2A, B** and

NLRP3 activation by TKIs

197 **Supplementary Fig. 2E**). Similarly, imatinib and masitinib induced robust, NLRP3-dependent  
198 IL-1 $\beta$  production in human PMA (phorbol 12-myristate 13-acetate)-differentiated THP-1 cells  
199 (myeloid cell line) and in LPS-primed murine bone marrow-derived macrophages (BMDMs)  
200 (**Fig. 2C** and **Supplementary Fig. 2F**), suggesting that imatinib and masitinib are novel  
201 activators of the NLRP3 inflammasome in murine and human myeloid cells. Indeed, MCC950,  
202 a small molecule that directly inhibits NLRP3 (37, 38), also inhibited IL-1 $\beta$  secretion in  
203 response to imatinib, masitinib and other NLRP3 activators both in murine BMDCs and LPS-  
204 primed human peripheral blood mononuclear cells (PBMCs), without interfering with AIM2  
205 inflammasome activation by poly(dA:dT) (**Fig. 2D, E**).

206 *Imatinib and masitinib trigger inflammasome-independent lytic cell death and K<sup>+</sup> efflux-*  
207 *dependent NLRP3 activation*

208 Interestingly, while imatinib- or masitinib-induced secretion of mature IL-1 $\beta$  was completely  
209 dependent on caspase-1 (**Fig. 2F**), these TKIs induced significant cell death even in cells  
210 lacking caspase-1 or GSDMD, indicating that they induce another lytic cell death mechanism  
211 in addition to caspase-1/GSDMD-dependent pyroptosis (**Fig. 2F**). Consistent with this, LDH  
212 release was also largely independent of NLRP3 and ASC and also occurred in the absence of  
213 LPS as a priming stimulus (**Supplementary Fig. 3A-C**), confirming that TKI can trigger cell  
214 death independent of the canonical NLRP3 inflammasome. Furthermore, inflammasome- and  
215 priming-independent release of alarmins such as IL-1 $\alpha$  or HMGB1 (**Fig. 2F** and  
216 **Supplementary Fig. 3D**) and priming-independent membrane damage (measured by Draq7  
217 uptake) and inflammasome activation (determined by ASC speck formation) (**Supplementary**  
218 **Fig. 3E**) demonstrate the strong and multifaceted proinflammatory potential of these TKIs due  
219 to their ability to trigger cell death, as well as their ability to trigger inflammasome activation  
220 even in unprimed cells.

## NLRP3 activation by TKIs

221 The data to this point indicated that imatinib and masitinib cause an inflammasome-  
222 independent form of lytic cell death, while IL-1 $\beta$  maturation in response to TKIs is  
223 inflammasome dependent. These observations are reminiscent of previous studies showing that  
224 different lytic cell death pathways can engage the NLRP3 inflammasome. Specifically,  
225 necroptotic cell death (39) or activation of the cytoplasmic LPS sensor caspase-11 (40, 41) lead  
226 to NLRP3 activation in myeloid cells by causing formation of MLKL or GSDMD membrane  
227 pores, respectively, and thereby efflux of K<sup>+</sup>. Extracellular KCl is an established means of  
228 blocking K<sup>+</sup> efflux and NLRP3 activation in response to cell death inducers and also classical  
229 NLRP3 activators like nigericin, ATP and MSU (16). We therefore hypothesized that TKIs  
230 might also engage NLRP3 by causing K<sup>+</sup> efflux downstream of membrane destabilization/lysis.  
231 Indeed, in contrast to imidazoquinolines like imiquimod and CL097, which cause K<sup>+</sup> efflux-  
232 independent NLRP3 activation (16), imatinib and masitinib triggered K<sup>+</sup> efflux and also  
233 required K<sup>+</sup> efflux for NLRP3 activation (**Fig. 2G-I**). By contrast, IL-1 $\beta$  secretion induced by  
234 imatinib and masitinib was intact in cells deficient in the necroptosome protein RIPK3, the  
235 non-canonical inflammasome protein caspase-11, or the pyroptotic pore protein GSDMD  
236 (**Supplementary Fig. 4A, B and Fig. 2F**). Other lytic cell modalities that might in principle  
237 also engage NLRP3 via K<sup>+</sup> efflux are ferroptosis, parthanatos and pyroptosis mediated by  
238 another gasdermin family member expressed in these cells, GSDME (42). Inhibitors of  
239 ferroptosis and parthanatos did not block imatinib and masitinib-induced LDH release  
240 (**Supplementary Fig. 4C and D**). Cells from GSDME-deficient mice likewise displayed an  
241 intact TKI-induced cell lysis or IL-1 $\beta$  secretion (**Supplementary Fig. 4E**). Collectively, these  
242 observations indicate that numerous established programmed lytic cell death modalities do not  
243 account for NLRP3 activation by imatinib and masitinib.

244 *Imatinib and masitinib induce myeloid cell-specific lytic cell death*

## NLRP3 activation by TKIs

245 We postulated that the cell death mechanisms induced by imatinib and masitinib are involved  
246 in NLRP3 activation, and therefore characterized the death induced by these TKIs in detail. To  
247 distinguish these NLRP3-independent upstream mechanisms from downstream effects of  
248 inflammasome activation (which also include further lysis via pyroptosis), for many  
249 experiments we utilized myeloid cells from inflammasome-deficient mice such as ASC  
250 knockouts (*Pycard*<sup>-/-</sup>). Notably, imatinib and masitinib only killed myeloid cells such as  
251 BMDCs and macrophages (**Fig. 2 and Supplementary Fig. 3**), but not other primary cells  
252 such as thymocytes or murine embryonic fibroblasts (MEFs), nor various cell lines (HeLa,  
253 HEK 293T, NIH-3T3, HCT 116) (**Fig. 3A, B and Supplementary Fig. 5A**). Furthermore,  
254 BCR-ABL1-dependent K562 cells did not display any cell lysis or LDH release after 3-h  
255 exposure to TKIs, and showed only minor cell lysis after 24-h exposure to TKIs  
256 (**Supplementary Fig. 5B**). Therefore, there is a degree of specificity that potentially implies  
257 regulation or programming in the cell death induced by imatinib and masitinib, and/or  
258 fundamental differences in the biology of myeloid cells that make them acutely sensitive to  
259 TKI-induced death. If TKIs simply caused general cytotoxicity for instance due to high  
260 concentrations, we would expect that these TKIs would also kill other cell types  
261 indiscriminately.

262 We next characterized the cell death induced by imatinib or masitinib by flow cytometry and  
263 microscopy using stains for phosphatidylserine (PS) exposure (Annexin V) and cellular  
264 permeability/lysis (7-AAD, Draq7). The TKIs induced exposure of PS and permeability to 7-  
265 AAD, and this occurred independently of ASC, suggesting that these events were not a result  
266 of pyroptosis as a consequence of canonical NLRP3 inflammasome activation (**Fig. 3C**).  
267 Although PS exposure is classically used as a marker of apoptosis, it is not considered specific  
268 as it also occurs during other cell death processes (43). Furthermore, the pan-caspase inhibitor  
269 zVAD-fmk blocked apoptosis induced by raptinal (44) but did not prevent PS exposure or 7-



## NLRP3 activation by TKIs

270 AAD uptake in TKI-treated cells, indicating that TKI-induced myeloid cell death is not caused  
271 by caspase activity and is therefore unlikely to be apoptosis (**Fig. 3D**).

272 Imatinib and masitinib induced striking morphological changes in myeloid cells, in particular  
273 the formation of large membrane distensions we termed ‘balloons’ to distinguish them from  
274 the small, numerous blebs typical of apoptotic cells (**Fig. 3E, F, and Supplementary Fig. 5D**).  
275 Transmission electron microscopy confirmed large balloons of the cell membrane, as well as  
276 swelling of internal membranous organelles and vacuolization in TKI-treated cells (**Fig. 3G,**  
277 **Supplementary Fig. 6**). The morphological changes occurred independently of ASC and were  
278 clearly distinct from pyroptosis induced by nigericin or the imiquimod analogue and NLRP3  
279 activator CL097 or apoptosis induced by raptinal (**Fig. 3E-G, Supplementary Fig. 6**). The  
280 imatinib-induced changes in membrane morphology and loss of membrane integrity (as  
281 indicated by permeability to Draq7) preceded PS exposure (**Supplementary Fig. 5C**).  
282 Together with the insensitivity to caspase inhibition (**Fig. 3D**) and the substantial LDH release  
283 (*e.g.* **Fig. 2F, 3B**), this shows that the cell death modality induced by TKIs is clearly distinct  
284 from apoptosis and that changes in accessibility of PS to Annexin V in TKI-treated cells is  
285 likely a consequence of cell lysis rather than the flipping of PS to the outer leaflet, as is  
286 characteristic of apoptosis.

### 287 *PEG blocks TKI-driven cell lysis and inflammasome activation*

288 To determine whether loss of membrane integrity is an upstream event required for NLRP3  
289 activation in response to TKIs, we examined the effect of the cytoprotectant polyethylene  
290 glycol (PEG) in ASC-deficient cells. High molecular weight PEG protects mammalian cells  
291 from diverse lytic cell death modalities by preserving membrane integrity (7, 45).  
292 Preincubation with PEG protected the cells from TKI-induced loss of membrane integrity,  
293 exposure of PS, and formation of membrane balloons (**Fig. 4A, B**), but as expected did not



## NLRP3 activation by TKIs

294 prevent raptinal-induced apoptosis (**Fig. 4A**). Furthermore, treatment with either PEG-600 or  
295 PEG-3000 prevented TKI-induced cellular ATP loss and LDH release (**Fig. 4C, D**), suggesting  
296 that loss of cellular ATP is not the cause but rather a consequence of death induced by TKIs.  
297 In contrast, PEG did not interfere with inhibition of tyrosine phosphorylation in BCR-ABL1–  
298 dependent K-562 myelogenous leukemia cells (**Supplementary Fig. 7A**) indicating that TKI  
299 entry into cells and action on target kinases is intact in the presence of PEG. Furthermore,  
300 BMDCs treated with PEG continued to secrete the cytokine tumor necrosis factor (TNF) in  
301 response to LPS (**Supplementary Fig. 7B**), indicating that PEG does not prevent basic cellular  
302 functions such as protein production and secretion.

303 Remarkably, PEG blocked not only TKI-induced inflammasome-independent lytic cell death,  
304 but also caspase-1 activation and IL-1 $\beta$  secretion, whereas smaller osmoprotectants such as  
305 sucrose and glycine did not (**Fig. 4E** and **Supplementary Fig. 7C-E**). In contrast, PEG only  
306 slightly delayed NLRP3 inflammasome-dependent pyroptosis and IL-1 $\beta$  secretion induced by  
307 nigericin (**Fig. 4E**). This indicates that PEG potently inhibits the TKI-induced inflammasome-  
308 independent lytic cell death, but not other types of lytic cell death such as pyroptosis.  
309 Importantly, these findings demonstrate that TKI-induced NLRP3 activation requires lytic cell  
310 death or membrane destabilization.

### 311 *Imatinib and masitinib induce lysosomal membrane destabilization*

312 A plausible hypothesis is that the observed organelle swelling and vacuolization (**Fig. 3** and  
313 **Supplementary Fig. 5 and 6**) could be an upstream event of cell lysis. The cellular  
314 morphology of TKI-treated myeloid cells observed in transmission electron microscopy (TEM)  
315 (**Fig. 3G** and **Supplementary Fig. 6**) is reminiscent of that induced by LLOMe, a soluble  
316 peptide that triggers lysosomal damage as well as NLRP3 activation (46). MSU crystals and  
317 other particulate activators, after partial phagocytic uptake, disrupt lysosomal and cellular

## NLRP3 activation by TKIs

318 membranes and trigger NLRP3 in a  $K^+$  efflux-dependent manner (**Supplementary Fig. 8A**)  
319 (16-19, 30). Particulate and LLOMe-induced cell lysis was reported to be inflammasome  
320 independent (8, 47), which is similar to our observations with TKIs. No precipitate was  
321 observed microscopically in TKI-treated conditions (not shown), and the phagocytosis  
322 inhibitor cytochalasin D blocked inflammasome activation in response to MSU crystals but not  
323 in response to imatinib or masitinib (**Supplementary Fig. 8B**), suggesting that the TKIs do not  
324 activate NLRP3 by forming particulates / precipitates. However, imatinib and masitinib  
325 nonetheless triggered rapid and substantial lysosomal swelling, as shown by live cell imaging  
326 with acridine orange staining (**Fig. 5A, Supplementary Fig. 8C**). PEG pretreatment had no  
327 influence on lysosomal swelling itself, suggesting that PEG uncouples lysosomal damage from  
328 cell death and NLRP3 activation. Even in the presence of PEG-3000 (to prevent the  
329 confounding effects of cell death) TKI-induced lysosomal swelling was followed by lysosomal  
330 leakage, as indicated by a loss in the red lysosomal signal of this dye (19) (**Fig. 5B**). Lysosomal  
331 membrane destabilization is thought to connect to cell lysis and  $K^+$  efflux for NLRP3 activation  
332 through the activity of lysosomal cathepsins in the cytoplasm, which can be blocked by  
333 inhibitors such as CA-074Me (19, 47). CA-074Me significantly reduced LDH release and IL-  
334  $1\beta$  secretion in response to MSU and TKIs, while having no effect on NLRP3 inflammasome  
335 activation by nigericin (**Fig. 5C**). PEG also prevented MSU particle-induced lysis and IL- $1\beta$   
336 release (**Fig. 5D**). Together, these results establish high molecular weight PEG as a robust  
337 inhibitor of lysosomal membrane permeabilization-induced cell lysis and NLRP3 activation  
338 and demonstrate that TKIs activate NLRP3 via the lysosomal pathway.

339 *Multiple clinically relevant TKIs induce lysosomal swelling, PEG-sensitive myeloid cell lysis,*  
340 *and NLRP3 inflammasome activation*

341 To determine whether other TKIs destabilize myeloid cell membranes and activate NLRP3, we  
342 tested several additional molecules of this class (**Supplementary Table 1**) for the induction of

## NLRP3 activation by TKIs

343 lytic myeloid cell death. We found that in addition to imatinib and masitinib, crizotinib  
344 (Xalkori<sup>TM</sup>) and bosutinib (Bosulif<sup>TM</sup>) (**Fig. 6A**) as well as fedratinib (Inrebic<sup>TM</sup>), ponatinib  
345 (Iclusig<sup>TM</sup>), sunitinib (Sutent<sup>TM</sup>), and dasatinib (Sprycel<sup>TM</sup>) (**Supplementary Fig. 9A**) also  
346 induced the rapid release of LDH from ASC- or NLRP3-deficient BMDCs. This cell lysis was  
347 inhibited by PEG, suggesting the TKIs share similar mechanisms of cell lysis (**Fig. 6B** and  
348 **Supplementary Fig. 9B**). Indeed, like imatinib and masitinib, bosutinib and crizotinib caused  
349 lysosomal swelling as visualized by acridine orange (**Fig. 6C**). Consistent with our screening  
350 results (where crizotinib killed cells [**Fig. 1B**] and also induced IL-1 $\beta$  release, albeit just below  
351 the pre-defined threshold of the screen [**Fig. 1C**]) these TKIs induced substantial release of  
352 mature IL-1 $\beta$  from LPS-primed BMDCs (**Fig. 6D** and **Supplementary Fig. 9C**) as well as  
353 processing of caspase-1 and GSDMD (**Fig. 6E**). As seen for imatinib and masitinib, PEG, CA-  
354 074Me and extracellular KCl strongly reduced these effects, demonstrating that these TKIs  
355 engage the lysosomal pathway for NLRP3 activation (**Fig. 6D-F** and **Supplementary Fig. 9C**).  
356 Indeed, IL-1 $\beta$  secretion induced by crizotinib or bosutinib was dependent on NLRP3, ASC and  
357 caspase-1, demonstrating that these TKIs are NLRP3 inflammasome activators (**Fig. 6G**).  
358 Although several of the TKIs are established inhibitors of the kinase activity of ABL1, ABL2  
359 and the chimeric BCR-ABL1 oncoprotein, there does not seem to be a clear correlation between  
360 ABL inhibition in transformed cells and the ability to activate NLRP3 in primary myeloid cells.  
361 For example, masitinib, which is primarily a KIT inhibitor and does not inhibit ABL (48), does  
362 activate NLRP3, while nilotinib is an ABL inhibitor (49) but does not cause myeloid cell lysis  
363 (**Fig. 1B, 6A**).

364 To test whether these TKIs also activate human NLRP3, we treated PMA-differentiated THP-  
365 1 cells and LPS-primed primary human PBMCs with the identified TKI inflammasome  
366 activators. They also induced substantial IL-1 $\beta$  release from human cells (**Fig. 6H, I** and  
367 **Supplementary Fig. 9D**), and this was dependent on NLRP3 (**Fig. 6H** and **Supplementary**

## NLRP3 activation by TKIs

368 **Fig. 9D**), and inhibited by extracellular KCl as an inhibitor of K<sup>+</sup> efflux (**Fig. 6I**). Together,  
369 these data show that multiple clinically relevant TKIs induce IL-1 $\beta$  release from human  
370 myeloid cells by engaging the NLRP3 inflammasome.

## 371 **Discussion**

372 Loss-of-function screening strategies aimed at the identification of gene products required for  
373 inflammasome activation or at the discovery of small molecule inhibitors have given important  
374 insights into how inflammasomes are activated and regulated (50). For instance, a genome-  
375 wide CRISPR screen identified NEK7 as a factor involved in NLRP3 activation (50). However,  
376 particularly in the case of NLRP3, screening for activators as a means of interrogating the  
377 mechanism of activation might have an important advantage in comparison to loss-of-function  
378 approaches. This has to do with the nature of NLRP3, which seems to sense disturbances in  
379 cellular homeostasis. If we hypothesize that the mechanism of NLRP3 activation involves  
380 sensing disturbances in fundamental cellular processes, then attempts to identify these  
381 processes via loss-of-function approaches might fail to report important players because loss  
382 of such factors could impair homeostasis or viability in a way that would supersede or conceal  
383 any defect in NLRP3 activation as measured by inflammasome-dependent cell death. In  
384 contrast, screening for small molecule activators of NLRP3 and identifying their targets is a  
385 promising means to reveal upstream mechanisms that might be involved in preserving cellular  
386 homeostasis or reporting disturbances to NLRP3.

387 Here, we screened a library of small molecules and identified new activators of the NLRP3 and  
388 NLRP1 inflammasomes. The identification of the antineoplastic drug candidate VbP as an  
389 inflammasome activator is consistent with recent studies demonstrating that DPP8/9 inhibitors  
390 trigger NLRP1 activation by targeting NLRP1 for partial proteasomal degradation (25-29).  
391 Indeed, we confirmed that inflammasome activation induced by VbP or the more specific

## NLRP3 activation by TKIs

392 DPP8/9 inhibitor 1G244, which was also found in our screen, was abrogated by the proteasome  
393 inhibitor MG132. We believe that expansion of this screening strategy 1) by inclusion of  
394 genetic secondary screens (*e.g.* using cells from ASC-deficient mice), 2) by broader exploration  
395 of chemical space, and 3) by applying quantitative structure–activity relationship models  
396 represent a promising approach for dissecting the mechanism of NLRP3 activation. PEG will  
397 also be useful for future screening efforts for NLRP3 inflammasome activators since it can  
398 distinguish molecules that activate via the lysosomal pathway from those that trigger K<sup>+</sup> efflux  
399 directly or those that do not require K<sup>+</sup> efflux, with the latter being of high interest since they  
400 might provide long-sought insight into the proximal mechanisms of NLRP3 activation.  
401 Precision small molecule activators of NLRP3 (in contrast to currently available activators that  
402 either activate NLRP3 by triggering lysis and K<sup>+</sup> flux or have other pleiotropic effects on  
403 myeloid cells), might also have therapeutic value as immunostimulators, for instance in the  
404 setting of immunization, infectious disease or cancer immunotherapy, where NLRP3 activation  
405 has been shown to have a positive effect for the host (51).

406 A surprising finding of our study is that imatinib, the first molecularly targeted cancer therapy  
407 and other TKIs kill and trigger IL-1 $\beta$  secretion from myeloid cells. Imatinib and other TKIs are  
408 designed to kill or slow growth of cancer cells addicted to the oncogenes targeted by these  
409 small molecules. In BCR-ABL1-positive cancer cells, imatinib can induce caspase-dependent  
410 apoptotic death (52, 53), but in other cell types it has also been reported to trigger caspase-  
411 independent cell death pathways (54-57). Here we show that imatinib, masitinib, and other  
412 clinically relevant TKIs kill myeloid cells by causing lysosomal swelling and destabilization  
413 and vacuolization followed by loss of plasma membrane integrity. The cell death and NLRP3  
414 inflammasome activation mechanism triggered by imatinib and masitinib thus resembles the  
415 established lysosomal pathway induced by particulates (such as MSU, alum, silica, cholesterol

## NLRP3 activation by TKIs

416 crystals, and aggregates of endogenous proteins such as  $\beta$ -amyloid or islet amyloid  
417 polypeptide) and the lysosomotropic peptide LLOMe (19, 47).

418 An open question is how TKIs trigger lysosomal destabilization. One possibility is that this  
419 depends on common ‘off-target’ proteins shared by these TKIs. Examination of the primary  
420 kinase targets of the TKIs (58) revealed no obvious candidates. Published chemical proteomics  
421 studies have uncovered that TKIs simultaneously bind off-target proteins including other  
422 kinases and also non-kinases (59-61). However, our analysis of a publicly available database  
423 (61) also did not yield a clear pattern that would explain why some TKIs trigger myeloid cell  
424 death and NLRP3 activation while others do not (data not shown). An additional explanation  
425 is that physiochemical properties of the TKIs might lead to their accumulation in and disruption  
426 of the lysosomal compartment. Indeed, previous studies have shown that certain TKIs  
427 including imatinib accumulate in the lysosome (62, 63). Such lysosomotropic agents are  
428 generally basic and their protonation in the acidic lysosomal lumen decreases their membrane  
429 permeability and leads to their accumulation in the lysosome (64). In some cases, this can lead  
430 to an increase in the osmolarity of the lysosome, and to its swelling and eventual rupture (65).  
431 The high pK<sub>a</sub> (*i.e.* weak basic properties) and positive logP (partition coefficient, as an  
432 indicator of membrane permeability) of TKIs are consistent with their reported  
433 lysosomotropism. Importantly, however, some of the TKIs that do not activate NLRP3 also  
434 share these properties. Thus, further work will be required to explain why certain TKIs disrupt  
435 the lysosome and activate NLRP3 and others do not.

436 An intriguing observation is that TKIs triggered cell death specifically in myeloid cells and not  
437 in other cell types tested. Myeloid cells are also known as ‘professional phagocytes’ and a high  
438 lysosomal capacity is a hallmark of this lineage and a central aspect of their biology.  
439 Furthermore, they are sometimes faced with pathogens that escape from or disrupt the

## NLRP3 activation by TKIs

440 lysosome. Mechanisms to sense this disruption and alert neighboring immune cells might  
441 mitigate the spread of such pathogens. The myeloid specificity of the cell death triggered by  
442 TKIs might be explained by the high lysosomal capacity of these cells, leading to the release  
443 of high concentrations of death-inducing factors such as cathepsins. Previous studies suggested  
444 the involvement of several lysosomal cathepsins in NLRP3 activation in response to  
445 particulates and the lysosomotropic peptide LLOMe (47, 66). Inhibition of TKI-induced  
446 NLRP3 activation by the cathepsin inhibitor CA-074Me suggests that cathepsins are also  
447 involved in NLRP3 activation by these small molecules. The ability of PEG to prevent NLRP3  
448 activation by TKIs (and also by particulates) without blocking lysosomal leakage suggests that  
449 lysosomal leakage itself does not directly lead to NLRP3 activation. However, the ability of  
450 PEG to block cell lysis and NLRP3 activation in response to TKIs, as well as the requirement  
451 for  $K^+$  efflux suggest that TKI-induced lysosomal disruption causes NLRP3 activation by  
452 inducing plasma membrane damage and  $K^+$  efflux. Notably, PEG also blocks cell lysis and  
453 NLRP3 activation induced by particulates such as MSU, again pointing to the central role of  
454 lytic  $K^+$  efflux in NLRP3 activation via the lysosomal pathway. Since lysosome-disrupting  
455 particulates are implicated as key activators of NLRP3 in inflammatory disease, this finding  
456 provide insight into the mechanism of NLRP3 activation in disease. PEG also provides an  
457 experimental tool to uncouple lysosomal swelling from cell death and therefore to investigate  
458 the mechanism by which particulates and lysosomotropic molecules trigger cell death and  
459 NLRP3 activation.

460 The finding that imatinib and masitinib as well as other TKIs can kill myeloid cells and cause  
461 release of pro-inflammatory mediators raises the question as to whether this might contribute  
462 to their efficacy or adverse effects. The rapid lytic cell death we observed in primary myeloid  
463 cells in response to imatinib and masitinib did not occur in BCR-ABL1-positive cell lines,  
464 suggesting it does not directly contribute to elimination of cancer cells. However, the ability of



## NLRP3 activation by TKIs

465 selected TKIs to kill myeloid cells could potentially contribute to reported effects of TKIs such  
466 as myelosuppression, neutropenia, inhibition of dendritopoiesis, reduction of tumor-associated  
467 M1 macrophages, diarrhea, or increased susceptibility to infection (67, 68). Among TKIs,  
468 imatinib in particular has been reported to have pleiotropic immunological effects (69), to  
469 which the IL-1 $\beta$  we observed might contribute. IL-1 $\beta$  can display pro- or anti-neoplastic effects  
470 (67-69), but in hematological malignancies (70) and especially in chronic myelogenous  
471 leukemia (which is a major therapeutic setting for imatinib) appears to promote disease  
472 progression (71, 72). Therefore, the NLRP3-dependent cytokine secretion induced by imatinib  
473 probably does not significantly contribute to its clinical efficacy. A major consideration in  
474 evaluating whether our findings are relevant in the therapeutic setting is that the minimum  
475 doses of TKIs required to trigger lytic cell death and inflammasome activation exceed those  
476 generally needed to inhibit the kinase. Imatinib inhibits BCR-ABL1 activity with a IC<sub>50</sub> ranging  
477 from 0.12- 0.47  $\mu$ M (73, 74) *in vitro* and complete inhibition is achieved at 1  $\mu$ M (52, 53).  
478 Though pharmacokinetic studies suggest that the mean steady-state plasma concentration for a  
479 daily imatinib dose of 400 mg is about 2  $\mu$ M, imatinib reaches average peak plasma  
480 concentrations of 5  $\mu$ M, with higher peak concentrations in the plasma of individual patients  
481 (75, 76). Although 5  $\mu$ M is somewhat below the range at which TKIs induce cell death and IL-  
482 1 $\beta$  secretion in cell culture, it is possible that local peak concentrations (*e.g.* in the upper  
483 gastrointestinal tract or liver for orally administered TKIs) may be sufficient to trigger  
484 membrane destabilization or NLRP3 activation in resident myeloid cells or potentially other  
485 cell types. However, it is clear that further studies will be needed to determine whether TKIs  
486 trigger lytic cell death and NLRP3 activation in the therapeutic setting, and if so, whether this  
487 influences patient outcomes.



## 488 **Materials and Methods**

### 489 *Mice*

490 *Nlrp3*<sup>-/-</sup> (30), *Pycard*<sup>-/-</sup> (77), *ICE*<sup>-/-</sup> (*Casp1/11*<sup>-/-</sup>) (78), *Casp1*<sup>-/-</sup> (32), *Casp1*<sup>mlt/mlt</sup> (32), *Gsdmd*<sup>-/-</sup>  
491 (32), ASC<sup>citricine</sup> (79), and wild-type mice of C57BL/6 and BALB/c backgrounds were housed  
492 under SOPF or SPF conditions at the Center for Experimental Models and Transgenic Services  
493 (CEMT, Freiburg, Germany), the Zentrum für Präklinische Forschung (ZPF, Munich,  
494 Germany), Charles River Laboratories (Calco, Italy), or the Center of Infection and Immunity  
495 (University of Lausanne, Epalinges, Switzerland) in accordance with local guidelines.

### 496 *Cell lines*

497 Cell lines were cultured in T75 flasks at 37°C, 5% CO<sub>2</sub> in a humidified incubator and  
498 continuously passaged. Media were supplemented with 10% fetal calf serum (FCS) (Gibco)  
499 and 100 U ml<sup>-1</sup> penicillin-streptomycin (Gibco). HeLa, HEK 293T, NIH-3T3 and mouse  
500 embryonic fibroblasts (MEF) were cultured in DMEM (Gibco) and MEF medium was  
501 additionally supplemented with 0.1% β-mercaptoethanol (Gibco). THP-1 cells were cultured  
502 in RPMI (Gibco) and HCT 116 cells were grown in McCoy's 5a Medium (Gibco).

### 503 *BMDC and BMDM Preparation and Stimulation*

504 Cells were cultured at 37°C, 5% CO<sub>2</sub> in a humidified incubator. Murine bone marrow-derived  
505 dendritic cells (BMDCs) and macrophages (BMDMs) were differentiated from tibial and  
506 femoral bone marrow as previously described in detail (80). Recombinant human M-CSF and  
507 murine GM-CSF (Immunotools) were used at 100 ng ml<sup>-1</sup> and 20 ng ml<sup>-1</sup>, respectively. After  
508 6 - 8 days of differentiation, cells were plated in 96-well plates at a density of 0.8 - 1.5x10<sup>5</sup>  
509 cells per well, primed with 20 - 150 ng ml<sup>-1</sup> *E. coli* K12 ultra-pure LPS (InvivoGen) for 2 - 3  
510 h, and treated with inflammasome activators, TKIs and other stimuli for 0.5 - 16 h. All  
511 stimulations were performed in triplicates and cytokine production in cell-free supernatants

## NLRP3 activation by TKIs

512 was measured by ELISA. TKIs were purchased from Sellekchem and treatment was typically  
513 performed at 20  $\mu$ M, 40  $\mu$ M, 60  $\mu$ M, and 80  $\mu$ M. Other inflammasome activators and stimuli  
514 were used as follows: 5 mM ATP (Sigma), 5  $\mu$ M nigericin (Sigma), 300  $\mu$ g ml<sup>-1</sup> MSU (prepared  
515 as previously described (30)), 1 - 2  $\mu$ g ml<sup>-1</sup> poly(dA:dT) (InvivoGen) (transfected with  
516 Lipofectamine 2000, Invitrogen), 100  $\mu$ M imiquimod (R837) (InvivoGen), 100  $\mu$ M CL097  
517 (InvivoGen), 1 - 10  $\mu$ M VbP (MedChem Express), 1 - 10  $\mu$ M 1G244 (Sigma), 1 - 10  $\mu$ M  
518 alogliptin (MedChem Express), 10  $\mu$ M raptinal (Adipogen), 1  $\mu$ M (1S,3R)-RSL3, and 1 mM  
519 H<sub>2</sub>O<sub>2</sub> (PHC Corporation). Inhibitors were added after 2 - 2.5 h of priming, and 20 - 60 min  
520 before stimulation with inflammasome activators. Inhibitor concentrations were typically used  
521 at the lowest dose showing robust, reproducible efficacy: 20 - 40  $\mu$ M zVAD-fmk (Enzo), 20 -  
522 60 mM KCl (Sigma), 3 - 5  $\mu$ M MCC950 (Adipogen), 50 - 200 nM MG132 (Sigma), 3  $\mu$ M  
523 cytochalasin D (Sigma), 50 - 150 mM PEG-600, 5 - 15 mM PEG-3000 (Sigma and Merck), 20  
524 - 30  $\mu$ M CA-074Me (Calbiochem), 0,4  $\mu$ M ferrostatin-1 (Biomol), 10  $\mu$ M PJ-34  
525 (MedChemExpress) 50 mM glycine (Labochem) and 50 mM sucrose (Sigma). To minimize  
526 off-target effects of extracellular KCl, it was added and mixed well by pipetting immediately  
527 before addition of inflammasome activators.

## 528 *PBMC isolation*

529 Peripheral blood samples were diluted 1:1 with PBS containing 2 mM EDTA, and human  
530 Pancoll, density 1077 g ml<sup>-1</sup> (Pan Biotech) was layered underneath. It was centrifuged for 30  
531 min at 475 x g, 21°C, the upper plasma layer was removed and the mononuclear cell layer  
532 carefully transferred to PBS-EDTA. After 15 min of centrifugation, the supernatant was  
533 completely removed and the cell pellet resuspended in red blood cell lysis buffer (BioLegend).  
534 The cells were washed and then cultured for at least 2 h in RPMI with 10% FCS, 100 U ml<sup>-1</sup>  
535 penicillin-streptomycin. Typically, 0.25x10<sup>6</sup> cells per well were plated in 96-well plates. The  
536 cells were then again washed and finally cultured in RPMI with 10% FCS, 100 U ml<sup>-1</sup>

## NLRP3 activation by TKIs

537 penicillin-streptomycin and 100 ng ml<sup>-1</sup> recombinant human M-CSF. After cultivation for at  
538 least 24 h, the cells were used for inflammasome stimulation (see *BMDC and BMDM*  
539 *Preparation and Stimulation*).

### 540 *Primary thymocyte isolation*

541 Primary murine thymocytes were isolated by removing the thymus from euthanized mice and  
542 mashing it through a 100 µm nylon cell strainer. Single cell suspensions were collected in  
543 RPMI with 10% FCS, 100 U ml<sup>-1</sup> penicillin-streptomycin and centrifuged for 5 min at 400 x g,  
544 4°C. Erythrocytes were lysed using red blood cell lysis buffer (Biolegend) and the reaction was  
545 stopped by addition of medium. For stimulation with TKIs and LDH release assay, 0.8x10<sup>6</sup>  
546 cells per well were plated to 96-well plates.

### 547 *Screening for inflammasome activators*

548 To identify small molecule NLRP3 activators, a 2-step high-throughput screening of a public  
549 Novartis small molecule library (33) was conducted. For primary screening, 200 nl of the small  
550 molecule stock solution (10 mM in DMSO) were transferred to white 384-well microplates  
551 (Greiner) using an Echo 555 Acoustic Technology Liquid Handler (Labcyte). BMDCs on day  
552 7 of differentiation were primed with 50 ng ml<sup>-1</sup> LPS and immediately plated in 40 µl medium  
553 to the small molecule-containing 384-well plates with a Multidrop Combi Reagent Dispenser  
554 (Thermo Fisher Scientific) at 0.25x10<sup>6</sup> cells ml<sup>-1</sup>. The final small molecule concentration was  
555 50 µM. Following 20 h of incubation at 37°C, 5% CO<sub>2</sub>, reduction in cell viability was  
556 determined as reduction of cellular ATP levels by using the CellTiter-Glo Luminescent Cell  
557 Viability Assay (Promega). Cells were treated with 5 µM nigericin as a positive control for  
558 inflammasome activation or 0.5% DMSO as a negative control. Compound testing was  
559 performed as single point measurements, whereas 8 wells of positive or negative control each  
560 were included per plate. To compare cell viability, the lowest luminescence signal obtained

## NLRP3 activation by TKIs

561 was subtracted from all signals and all luminescence signals were then calculated as % of the  
562 highest luminescence signal. Small molecules that reduced cellular ATP levels to less than 50%  
563 were considered active and therefore included in the functional secondary screen for IL-1 $\beta$   
564 release. For that, BMDCs on day 7 were treated with 50 ng ml<sup>-1</sup> LPS, directly plated to white  
565 384-well microplates and primed for 3 h at 37°C, 5% CO<sub>2</sub>. Subsequently, using an Echo 555  
566 Acoustic Technology Liquid Handler, 200 nl of the small molecule stock solutions (10 mM in  
567 DMSO) were transferred to the microplates giving a final concentration of 50  $\mu$ M and it was  
568 incubated for 20 h at 37°C, 5% CO<sub>2</sub>. Cell viability was assessed as in the primary screen and  
569 IL-1 $\beta$  in the cell- free supernatants was detected using a commercial mouse IL-1 $\beta$  homogenous  
570 time-resolved fluorescence (HTRF) kit (Cisbio) according to the manufacturer's instructions.  
571 In brief, anti-IL-1 $\beta$  cryptate antibody and anti-IL-1 $\beta$  d2 antibody were prediluted in detection  
572 buffer and mixed in equal parts. 10  $\mu$ l antibody mix was transferred to black, small volume  
573 384-well microplates (Greiner) with a Microlab STAR Liquid Handling System (Hamilton),  
574 10  $\mu$ l cell-free supernatants were added and it was incubated overnight at 4°C. Fluorescence  
575 signals were measured in a time-resolved manner. Again, cells were treated with 5  $\mu$ M  
576 nigericin as a positive control or 0.5 % DMSO as a negative control. HTRF signals for 0.5%  
577 DMSO were subtracted from all values and 5  $\mu$ M nigericin was set to 100% to assess IL-1 $\beta$   
578 signal intensity.

## 579 *Immunodetection of Proteins*

580 For cytokine quantification of cell-free supernatants, ELISA kits for murine and human IL-1 $\beta$ ,  
581 IL-1 $\alpha$  and TNF (eBioscience or Invitrogen) were used. ELISA data is depicted as mean  $\pm$ SD  
582 of technical triplicates as previously described (80). For immunoblot analysis, cell-free  
583 supernatant and cell lysate samples in SDS- and DTT-containing sample buffer were analyzed.  
584 Triplicates were pooled and proteins were separated by SDS-PAGE and transferred to  
585 nitrocellulose membranes using standard techniques (32). The following primary antibodies

## NLRP3 activation by TKIs

586 were used: anti-Caspase-1 (p20) mAb (Casper-1, Adipogen), IL-1 $\beta$ /IL-1F2 pAb (R&D  
587 Systems), anti-GSDMD (EPR19828, Abcam), anti-NLRP3/NALP3 mAb (Cryo-2, Adipogen),  
588 anti-Asc pAb (AL177, Adipogen),  $\beta$ -Actin mAb (8H10D10, #3700, Cell Signaling  
589 Technology), anti-HMGB1 antibody (ab18256, Abcam), and anti- $\alpha$ -tubulin mAb (T5168,  
590 Sigma).

### 591 *Cell Viability Assays*

592 Lytic cell death was determined by measuring LDH release from cell-free supernatants using  
593 a colorimetric assay (Promega or Takara) according to the manufacturer's protocol. Medium  
594 served as blank value and was subtracted from the sample values. Results were plotted as  
595 percentage of 100% dead cells lysed with lysis buffer 45 min prior to collection of the cell  
596 supernatants. Total cellular ATP was measured using a luminescent assay (CellTiter-Glo,  
597 Promega) according to the manufacturer's instructions. Data is depicted as mean  $\pm$ SD of  
598 technical triplicates

### 599 *Acridine orange staining of lysosomes*

600 BMDMs were plated at a density of  $0.1 \times 10^6$  cells per well in their regular medium into black-  
601 walled 96-well plates and stained for 15 min with acridine orange (Invitrogen) according to  
602 manufacturers instructions. The acridine orange containing medium was removed, cells were  
603 washed once with assay buffer consisting of PBS with 2.5% FCS, and assay buffer additionally  
604 containing 15 mM PEG-3000 was added. Cells were stimulated as indicated and fluorescence  
605 at  $\lambda_{ex}$  475- 495 nm and  $\lambda_{em}$  525- 545 nm was recorded every 2 minutes. Data is depicted as  
606 mean of technical triplicates.

### 607 *Fluorescence Imaging*

## NLRP3 activation by TKIs

608 BMDMs were plated at a density of  $0.05 - 0.1 \times 10^6$  cells per well in 8-well  $\mu$ -slides (IbiTreat,  
609 Ibidi). Cells were primed with  $50 \text{ ng ml}^{-1}$  LPS for 2 h followed by treatment with compounds  
610 as indicated. Cells were washed with PBS, fixed in 4% paraformaldehyde (PFA) for 10 min  
611 and permeabilized in PBS with 0.1% (v/v) Triton X-100 for 5 min. Cells were stained with  
612 anti-ASC primary antibody (AL177, Adipogen) diluted in blocking buffer consisting of PBS,  
613 5% FCS and 0.1% Triton X-100, followed by anti-rabbit IgG cross-absorbed secondary  
614 antibody (Alexa Fluor 555, Invitrogen), and finally mounted in Vectashield antifade mounting  
615 medium containing DAPI (Vector Laboratories).

616 For live cell imaging of unfixed cells at  $37^\circ\text{C}$  in a 5%  $\text{CO}_2$  humidified atmosphere, the cells  
617 were primed with  $50 \text{ ng ml}^{-1}$  LPS for 2 h or left unprimed and then stained as indicated. The  
618 following stains were used: Vybrant Dil cell-labeling solution (Invitrogen), Draq7  
619 (BioLegend), Annexin V-FITC apoptosis staining/detection kit (Abcam, BioLegend) and  
620 acridine orange (Invitrogen). Hoechst 3342 (Invitrogen) was used to stain the nuclei.

621 Confocal microscopy was performed with a Leica SP8 confocal microscope equipped with a  
622  $63\times/ 1.40$  and  $40\times/ 1.25$  oil objective (Leica Microsystems) keeping the laser settings of the  
623 images constant for each experiment to allow direct comparison of signal intensities between  
624 images of the same channel.

## 625 *K<sup>+</sup> Measurement*

626 Intracellular  $\text{K}^+$  measurements were performed by reflection X-ray fluorescence analysis  
627 (TXRF) as described previously (16). Cells were stimulated in 96-well plates. After  
628 supernatants were removed, the residual medium was completely aspirated. The cells were  
629 extracted by adding  $25 \mu\text{l}$  of an ultra-pure 3 % dilution of  $\text{HNO}_3$  in water containing  $5 \mu\text{g ml}^{-1}$   
630 vanadium as internal standard to the wells.  $5 \mu\text{l}$  lysates were spotted on a silicon wafer and

## NLRP3 activation by TKIs

631 evaporated to dryness. Measurement was performed with an Atomika TXRF 8010 device  
632 equipped with a molybdenum x-ray tube. Characteristic signals for potassium ( $EK\alpha = 3,31$   
633 keV) and vanadium ( $EK\alpha = 4,95$  keV) were used for data evaluation using the software Spectra  
634 Picofox (Bruker).

### 635 *Analysis of total phospho-Tyrosine*

636 K-562 cells were plated to non-tissue culture treated 96-well plates and treated with PEG and  
637 TKIs. After incubation, cells were spun down, resuspended in PBS and transferred to 96-well  
638 V-bottom plates. Cells were washed with PBS and stained with Zombie Aqua fixable viability  
639 dye (BioLegend) according to the manufacturer's instructions. Cells were then washed once  
640 with FACS buffer (PBS with 2% FCS) and fixed with 2% PFA. PFA was removed by  
641 centrifugation and the cells resuspended in PBS. To permeabilize the cells, 100% methanol  
642 was slowly added to the pre-chilled cells on ice to a final concentration of 90% methanol before  
643 a 30 min incubation on ice. Finally, intracellular immunostaining for total phospho-Tyrosine  
644 was performed by incubating with phospho-tyrosine mAb (P-Tyr-100 Alexa Fluor 647, Cell  
645 Signaling Technology). Cells were washed twice with and resuspended in FACS buffer and  
646 analyzed using a BD FACS Canto II flow cytometer (BD Biosciences). Data were acquired  
647 with DIVA (BD Biosciences) and analyzed with FlowJo software (FlowJo LLC, BD).

### 648 *Cell death characterization by flow cytometry*

649 Pacific Blue Annexin V Apoptosis Detection Kit with 7-AAD (BioLegend) was used to  
650 characterize cell death by flow cytometry. To this end, BMDCs were treated with TKIs as  
651 indicated, harvested with HBSS/EDTA, and transferred to 96-well V-bottom plates. Cells were  
652 stained with Pacific Blue Annexin V and 7-AAD in Annexin V binding buffer according to the  
653 manufacturer's protocol. The cells were washed and analyzed with a BD FACS Canto II (BD

## NLRP3 activation by TKIs

654 Biosciences) flow cytometer. Data were acquired with DIVA (BD Biosciences) and were  
655 analyzed with FlowJo software (FlowJo LLC, BD).

### 656 *Transmission electron microscopy*

657 After 7 days of cultivation, 10<sup>7</sup> BMDMs in 10 ml medium were transferred to 50 ml conical  
658 centrifugation tubes and incubated with 40 μM imatinib, 20 μM masitinib or 0.05% DMSO for  
659 2 h at 37°C, 5% CO<sub>2</sub>. During incubation, the tubes were inverted every 15 min to prevent  
660 attachment of the cells to the walls of the tube, and to ensure equal distribution of the added  
661 compounds. Glutaraldehyde (GA) was added to a final concentration of 1% and the cells were  
662 fixed for a maximum of 10 min at 37°C, 5% CO<sub>2</sub>. The cell suspension was centrifuged for 5  
663 min at 400 x g, 4°C and the cell pellet was resuspended in HEPES buffer with 1% GA and  
664 further fixed for 2 h at room temperature. The fixed cells were then left in suspension at 4°C  
665 overnight.

666 Cells were collected by centrifugation at 400 x g for 5 min and cell pellets were embedded in  
667 2% low melting agarose. Pellets were washed five times for 10 min each with HEPES buffer  
668 at room temperature and post fixed for 2 h at 4°C with a 1% aqueous solution of OsO<sub>4</sub>. Cells  
669 were five times washed with distilled H<sub>2</sub>O for 10 min each and *en bloc* stained with 1% uranyl  
670 acetate in water for 1 h at room temperature. Dehydration in increasing graded series of ethanol  
671 from 30% to 95% (10 min per change) followed by 100% ethanol twice, and 100% acetone  
672 twice for 30 min was carried out before embedding in Epon 812 resin. Sections of 70 nm were  
673 obtained using a Reichert-Jung ultramicrotome and collected in slot grids. After post staining  
674 with 2% uranyl acetate and Reynolds lead-citrate stain, sections were observed in a Philips  
675 CM-10 (80 kV) electron microscope equipped with a Gatan Bioscan 792 camera or with a  
676 Hitachi TEM 7800 (80 kV) equipped with an EMSIS Xarosa camera.



NLRP3 activation by TKIs

677 *Global analysis of hits as compared to the whole library*

678 Novartis small molecule library annotation data (manually adjusted for library composition  
679 used for screening (33)) was extended using the webchem R package  
680 (DOI:10.18637/jss.v093.i13 (1.1.0 with R 3.6.3)) and manual curation.

## 681 **Acknowledgements**

682 The authors thank the animal caretakers at University Medical Center Freiburg and Klinikum  
683 rechts der Isar Munich for their support, and Susanne Weiß, Ina Spierer, Valentin Höfl, Gerrit  
684 Siegers, Caroline Schwenzel, Nico Wanjura, Timo Kleindienst, Shaumya Kulendran, Rosula  
685 Hinnenberg, and Natacha Stoehr for technical assistance. Klaus-Peter Knobloch provided  
686 primary MEFs, Romeo Ricci provided NLRP3-deficient THP-1 cells, Lena Illert provided K-  
687 562 cells, Petr Broz provided *Gsdme*<sup>-/-</sup> BMDMs. We also thank Robert Huber, Ruth Geiss-  
688 Friedlander, Guillaume Médard, Robert Zeiser, Marco Prinz, Angelika Rambold, Anne-  
689 Kathrin Classen and Paul Manley for helpful discussions.

## 690 **Funding**

691 This work was supported by the Deutsche Forschungsgemeinschaft (DFG, German Research  
692 Foundation) through SFB 1160 (Project ID 256073931), SFB/TRR 167 (Project ID  
693 259373024), SFB 1425 (Project ID 422681845), SFB 1479 (Project ID 441891347) (to O.Gr.),  
694 SFB 850 Project B7 (to T.R.), GRK 2606 (Project ID 423813989) (to O.Gr. and T.R.), SFB  
695 1335 (Project ID 360372040) (to P.J.J.), and under the Germany's Excellence Strategy (CIBSS  
696 - EXC-2189 - Project ID 390939984, to O.Gr., R.B. and T.O.), as well as by the European  
697 Research Council (ERC) through Starting Grant 337689 and Proof-of-Concept Grant 966687  
698 (to O.Gr.), and the German Consortium for Translational Cancer Research (DKTK) (to T.R.).  
699 The TEM (Hitachi HT7800) was funded by the DFG grant INST 39/1153-1 and is operated by

## NLRP3 activation by TKIs

700 the University of Freiburg, Faculty of Biology, as a partner unit within the Microscopy and  
701 Image Analysis Platform (MIAP) and the Life Imaging Center (LIC), Freiburg.

### 702 **Author Contributions**

703 E.N., G.M., T.C., A.K., S.W., B.S.S., N.F., O.Go., and C.J.G. performed experiments and  
704 analyzed data, prepared figures, and wrote figure legends and the methods section of the  
705 manuscript. C.A., C.P., A.B., and C.J.F. helped design, perform and analyze the screen. M. R.-  
706 F. generated EM data. S.F., S.R. and R.B. performed bioinformatics analysis. T.O., M.T. and  
707 T.R. helped design and interpret a portion of the experiments. O.Go. and P.J.J. supervised a  
708 portion of the work. O.Gr. and C.J.G. wrote the main text of the manuscript, with the help of  
709 E.N. and O.Go. O.Gr. conceived and oversaw the project.

### 710 **Competing interests**

711 S.R., C.A., C.P., A.B., and C.J.F. are employees of Novartis, Basel, Switzerland. P.J.J. has had  
712 a consulting or advisory role, received honoraria, research funding, and/or  
713 travel/accommodation expenses not related to the present work from: Ariad, Abbvie, Bayer,  
714 Boehringer, Novartis, Pfizer, Servier, Roche, BMS and Celgene, Pierre Fabre, Janssen /  
715 Johnson&Johnson, MSD.

716 **Figures**

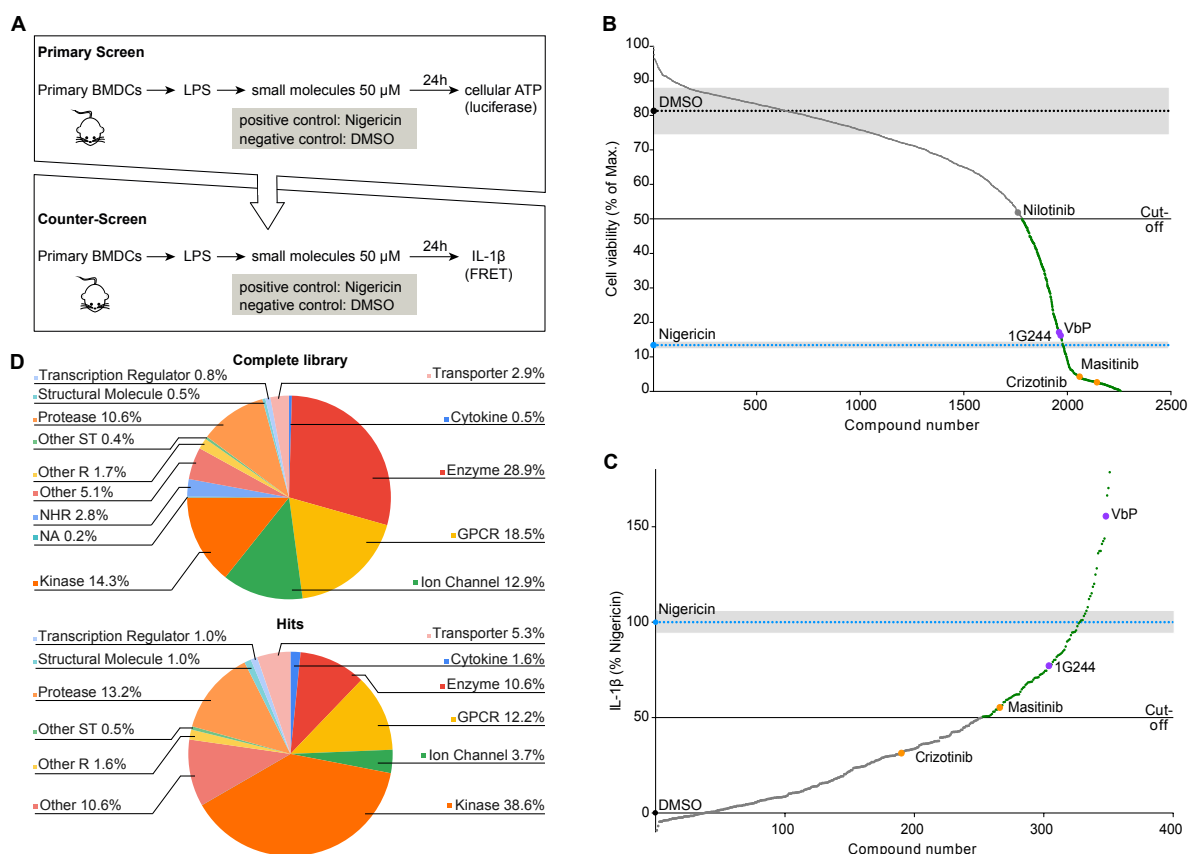

717

718 **Fig. 1: Small molecule screen for inflammasome activators**

719 (A) Schematic overview of the two-step screening strategy.

720 (B) Cell viability of LPS-primed BMDCs was assessed by determining total cellular ATP after incubation with the compound library at 50  $\mu$ M for 20 h. 5  $\mu$ M nigericin was used as a positive  
721 or 0.5% DMSO as a negative control for loss of viability.  
722

723 (C) BMDCs were primed with LPS and stimulated with compounds identified from the primary  
724 screen (B) at 50  $\mu$ M for 20 h. Release of IL-1 $\beta$  into the supernatants was determined by FRET-  
725 based HTRF technology and is depicted as % of IL-1 $\beta$  release induced by 5  $\mu$ M nigericin.

726 (D) Global analysis of the targets of the 98 hits as compared to the whole library. Description  
727 of which mode-of-actions / targets / structural characteristics are enriched. GPCR: G protein-  
728 coupled receptor, NHR: nuclear hormone receptor, other R: other receptor, other ST: other  
729 signal transducer, NA: not available.

NLRP3 activation by TKIs

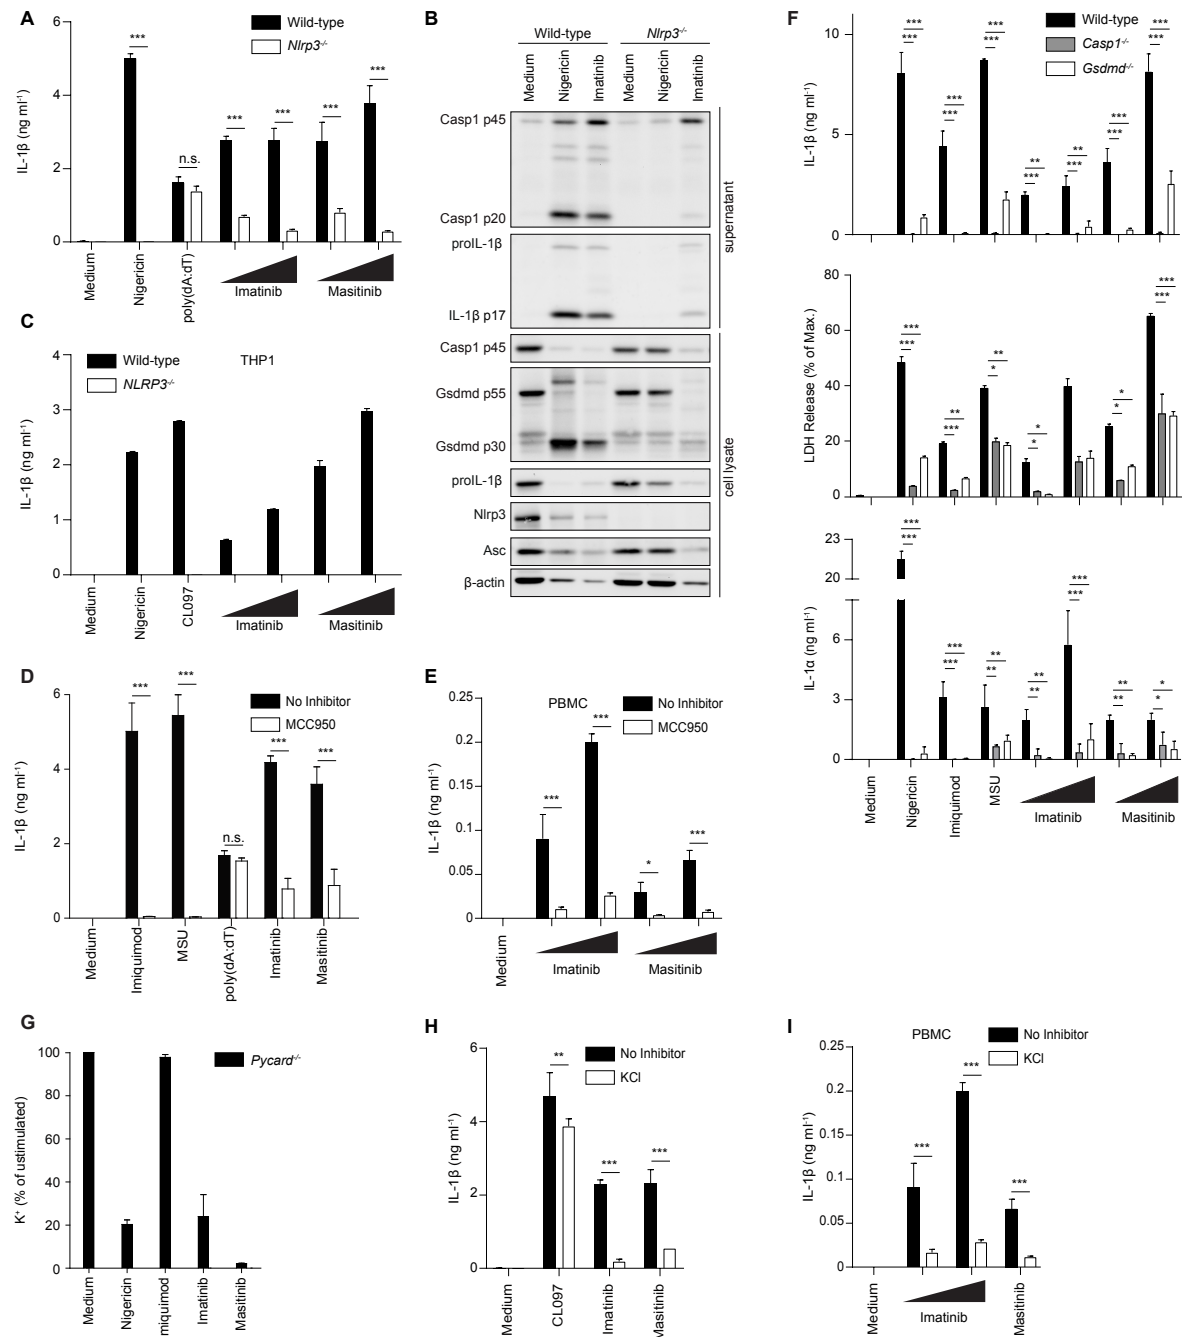

730

731 **Fig. 2: Imatinib and masitinib activate the NLRP3 inflammasome and trigger**  
 732 **inflammasome-independent lytic cell death**

733 (A) BMDCs from wild-type and *Nlrp3*<sup>-/-</sup> mice were primed with LPS and then stimulated for  
 734 3 h with 5  $\mu$ M nigericin, 2  $\mu$ g ml<sup>-1</sup> poly(dA:dT), 40  $\mu$ M and 60  $\mu$ M imatinib, or 20  $\mu$ M and  
 735 40  $\mu$ M masitinib, respectively and IL-1 $\beta$  secretion was measured.

736 (B) Immunoblot analysis of cell lysates and supernatants from wild-type and *NLRP3*-deficient,  
 737 LPS-primed BMDCs stimulated with 5  $\mu$ M nigericin, 40  $\mu$ M imatinib, or left untreated for 3  
 738 h.

739 (C) Wild-type and *NLRP3*<sup>-/-</sup> THP-1 cells were treated with 200 ng ml<sup>-1</sup> PMA for 3 h, washed  
 740 and left at 37°C, 5% CO<sub>2</sub> overnight. The cells were subsequently primed with 150 ng ml<sup>-1</sup> LPS  
 741 for 3 h and treated with 5  $\mu$ M nigericin, 100  $\mu$ M CL097 or 60  $\mu$ M and 80  $\mu$ M of the respective

NLRP3 activation by TKIs

742 TKI for 3 h and IL-1 $\beta$  secretion was measured. Values in NLRP3-deficient cells were below  
743 detection limit.

744 **(D)** LPS-primed BMDCs were treated with 5  $\mu$ M MCC950 30 min prior to stimulation with  
745 100  $\mu$ M imiquimod, 300  $\mu$ g ml<sup>-1</sup> MSU, 2  $\mu$ g ml<sup>-1</sup> poly(dA:dT) and 40  $\mu$ M imatinib or masitinib  
746 and IL-1 $\beta$  secretion was measured.

747 **(E)** LPS-primed human PBMCs were treated with 3  $\mu$ M MCC950 30 min prior to stimulation  
748 with 60  $\mu$ M and 80  $\mu$ M imatinib or masitinib for 3 h and IL-1 $\beta$  secretion was measured.

749 **(F)** LPS-primed BMDCs from wild-type, *Casp1*<sup>-/-</sup> and *Gsdmd*<sup>-/-</sup> mice were stimulated with 5  
750  $\mu$ M nigericin, 100  $\mu$ M imiquimod, 300  $\mu$ g ml<sup>-1</sup> MSU or increasing concentrations of imatinib  
751 (40  $\mu$ M, 60  $\mu$ M) and masitinib (20  $\mu$ M, 40  $\mu$ M) and IL-1 secretion and LDH release were  
752 measured.

753 **(G)** LPS-primed BMDCs from ASC-deficient *Pycard*<sup>-/-</sup> mice were stimulated with 5  $\mu$ M  
754 nigericin, 100  $\mu$ M imiquimod, 60  $\mu$ M imatinib, or 40  $\mu$ M masitinib. Intracellular K<sup>+</sup>  
755 concentrations were determined by total reflection x-ray fluorescence analysis (TXRF). Data  
756 is depicted as percentage K<sup>+</sup> content of unstimulated cells.

757 **(H)** LPS-primed BMDCs were incubated with 60 mM KCl in BMDC medium or BMDC  
758 medium for 30 min and then treated with 100  $\mu$ M CL097, 40  $\mu$ M imatinib or 20  $\mu$ M masitinib  
759 for 3 h and IL-1 $\beta$  secretion was measured.

760 **(I)** LPS-primed human PBMCs were incubated with 60 mM KCl 30 min prior to stimulation  
761 with 60  $\mu$ M and 80  $\mu$ M imatinib or 80  $\mu$ M masitinib and IL-1 $\beta$  secretion was measured.

762 Cytokine secretion and LDH release were determined by ELISA or using a colorimetric assay,  
763 respectively, from cell-free supernatants and data are depicted as mean  $\pm$ SD of technical  
764 triplicates. Results are representative of at least three independent experiments. Multiple  
765 unpaired T-tests were performed for statistical analysis (\*,  $p < 0.05$ ; \*\*,  $p < 0.01$ ; \*\*\*,  $p <$   
766 0.001; n.s., not significant).

### NLRP3 activation by TKIs

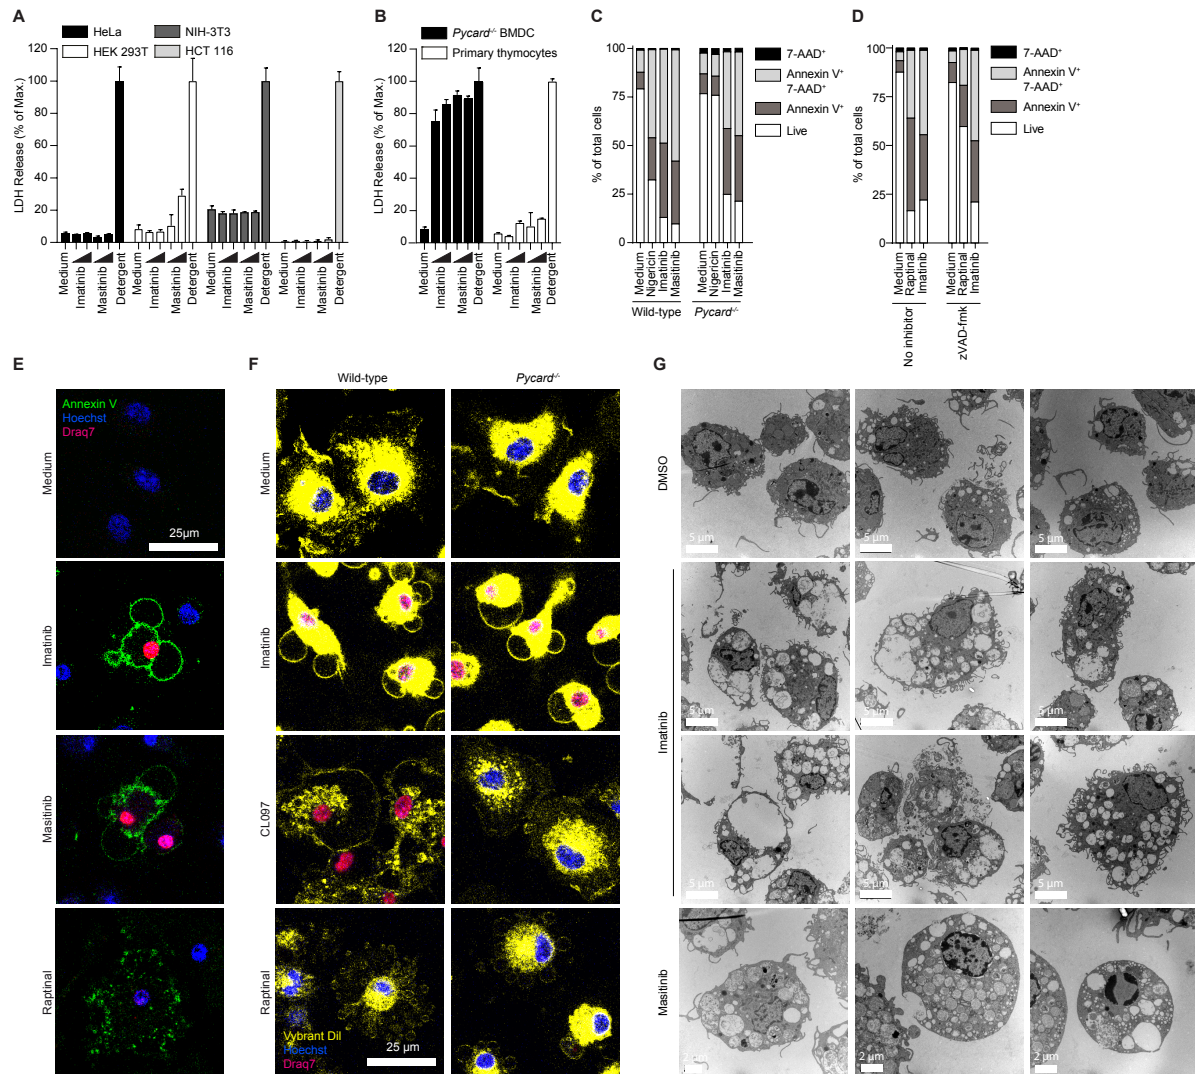

767

768

### Fig. 3: Imatinib and masitinib induce lytic death specifically in myeloid cells

769

770

771

772

773

774

775

776

777

778

779

780

781

782

783

784

785

(A) and (B) HeLa, HEK 293T, NIH-3T3, and HCT 116 cells (A) were treated with 20 and 40  $\mu$ M imatinib, 10 and 20  $\mu$ M masitinib or left untreated for 5 h. BMDCs and primary thymocytes from *Pycard*<sup>-/-</sup> mice (B) were incubated with 40 and 60  $\mu$ M imatinib and masitinib or left untreated for 4 h. Cells were lysed as a positive control for maximum lysis (“Detergent”). LDH was determined from cell-free supernatants by a colorimetric assay and data are depicted as mean (SD) of technical triplicates.

(C) and (D) LPS-primed BMDCs from wild-type and ASC-deficient *Pycard*<sup>-/-</sup> mice were stimulated with 5  $\mu$ M nigericin, 60  $\mu$ M imatinib or 40  $\mu$ M masitinib (C) or NLRP3-deficient BMDCs incubated with 30  $\mu$ M zVAD-fmk or medium 30 min prior to stimulation with 10  $\mu$ M raptinal and 40  $\mu$ M imatinib (D) and the cells were subsequently labelled with Annexin-V/ 7-AAD and analyzed by flow cytometry.

(E) LPS-primed wild-type BMDMs were stimulated with 40  $\mu$ M imatinib, 20  $\mu$ M masitinib, 10  $\mu$ M raptinal, or left untreated. The cells were stained with FITC Annexin V (green), nuclei were localized with Hoechst 33342 (blue) and DRAQ7 (red) and subsequently imaged by confocal microscopy 30 min after the stimulation.

(F) LPS-primed wild-type and ASC-deficient *Pycard*<sup>-/-</sup> BMDMs were stimulated with 40  $\mu$ M imatinib, 100  $\mu$ M CL097 and 10  $\mu$ M raptinal. The cell membrane was stained with Vybrant



NLRP3 activation by TKIs

786 Dil Cell-Labeling Solution (yellow), nuclei were localized with Hoechst 33342 (blue) and  
 787 DRAQ7 (red). Images were taken before or 60 min after the stimulation by confocal  
 788 microscopy.

789 (G) LPS-primed ASC-deficient *Pycard*<sup>-/-</sup> BMDMs were stimulated with 40  $\mu$ M imatinib, 20  
 790  $\mu$ M masitinib or DMSO for 2 h. Cells were fixed by adding 1% glutaraldehyde and  
 791 subsequently analyzed by transmission electron microscopy.

792

793

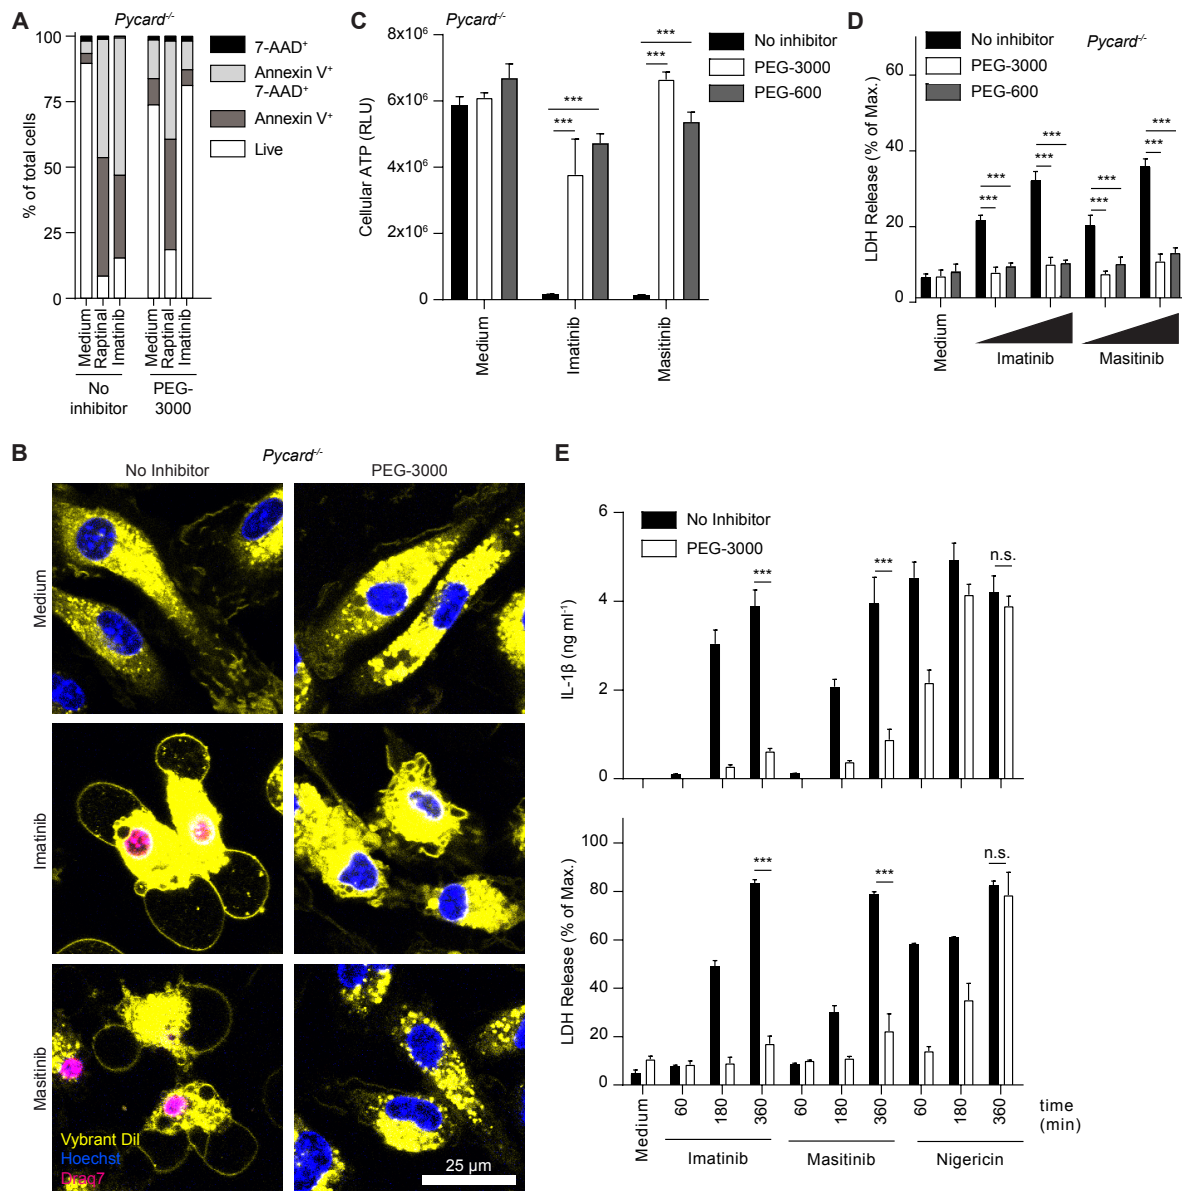

794

795 **Fig. 4: PEG rescues TKI-driven cell lysis and inflammasome activation**

796 (A) ASC-deficient *Pycard*<sup>-/-</sup> BMDCs were primed with LPS and then incubated with 10 mM  
 797 PEG-3000 or left untreated 30 min prior to stimulation with 10  $\mu$ M raprinal or 40  $\mu$ M imatinib  
 798 for 3 h. Cells were stained with Annexin-V and 7-AAD and analyzed by flow cytometry.

799 (B) LPS-primed BMDMs from ASC-deficient *Pycard*<sup>-/-</sup> mice were treated with 10 mM PEG-  
 800 3000 for 30 min and then stimulated with 40  $\mu$ M imatinib, 20  $\mu$ M masitinib or left untreated.

NLRP3 activation by TKIs

801 The cell membrane was stained with Vybrant DiI Cell-Labeling Solution (yellow), nuclei were  
802 localized with Hoechst 33342 (blue) and DRAQ7 (red). Images were taken 60 min after the  
803 stimulation.

804 (C) and (D) LPS-primed ASC-deficient *Pycard*<sup>-/-</sup> BMDCs were incubated with 15 mM PEG-  
805 3000, 150 mM PEG-600 or left untreated for 30 min and then stimulated with 40  $\mu$ M imatinib  
806 and 20  $\mu$ M masitinib for 3 h. Cellular ATP levels were determined using a luminescent assay  
807 (C).

808 (E) LPS-primed wild-type BMDCs were incubated with 15 mM PEG-3000 or medium for 30  
809 min. Cells were then stimulated with 40  $\mu$ M imatinib, 20  $\mu$ M masitinib or 5  $\mu$ M nigericin as  
810 indicated.

811 IL-1 $\beta$  secretion and LDH release were determined by ELISA or using a colorimetric assay,  
812 respectively, from cell-free supernatants and data are depicted as mean  $\pm$ SD of technical  
813 triplicates. Results are representative of at least three independent experiments. Multiple  
814 unpaired T-tests were performed for statistical analysis (\*,  $p < 0.05$ ; \*\*,  $p < 0.01$ ; \*\*\*,  $p <$   
815  $0.001$ ; n.s., not significant).

816

817

818

819



NLRP3 activation by TKIs

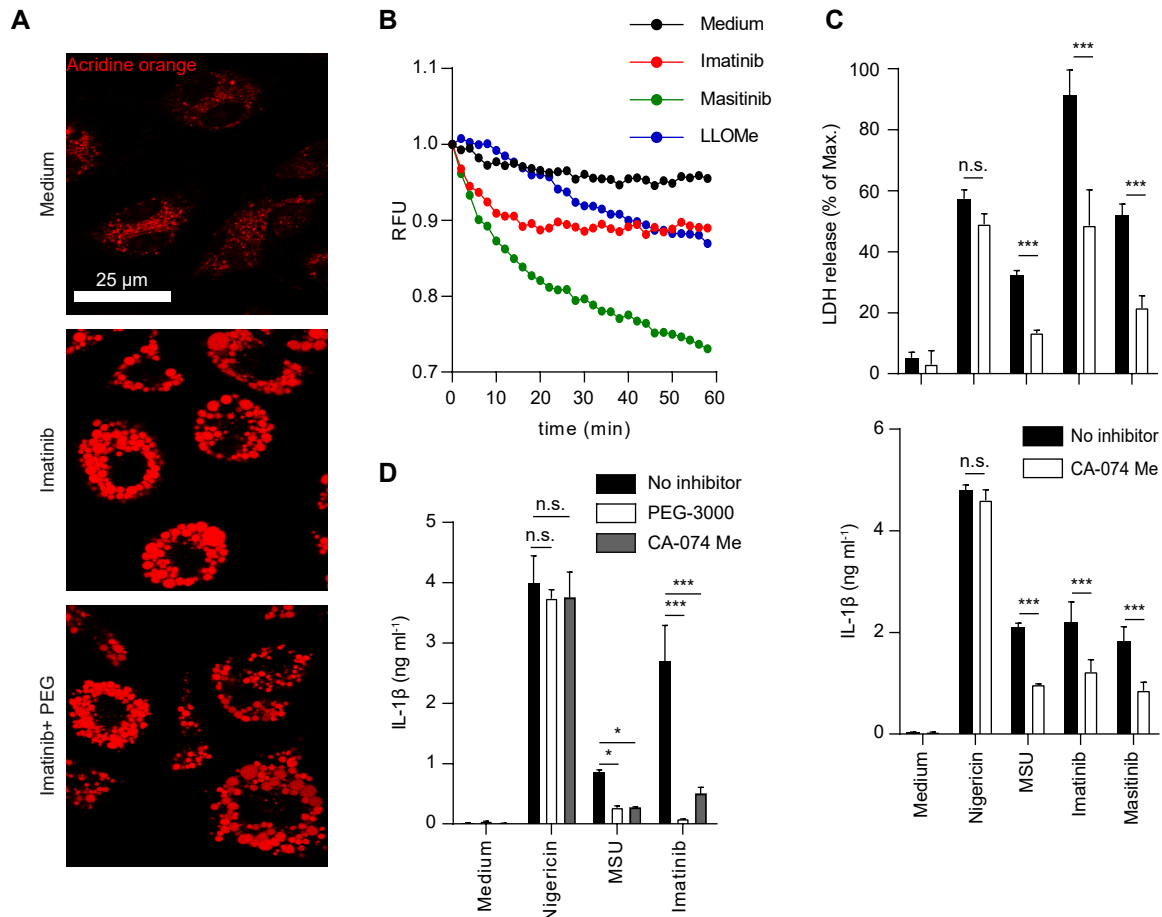

820

821 **Fig. 5: Imatinib and masitinib induce lysosomal damage**

822 (A) ASC-deficient *Pycard*<sup>-/-</sup> BMDMs were stained with acridine orange and incubated with 15  
823 mM PEG-3000 or left untreated 30 min prior to stimulation with 40  $\mu$ M imatinib. Cells were  
824 analyzed by fluorescence microscopy after 90 min.

825 (B) Acridine orange-stained ASC-deficient *Pycard*<sup>-/-</sup> BMDMs were stimulated with 40  $\mu$ M  
826 Imatinib, 20  $\mu$ M Masitinib, 1.25 mM LLOMe or left untreated in the presence of 15 mM PEG-  
827 3000 and subsequently analyzed using a fluorescence plate reader.

828 (C) LPS-primed wild-type BMDCs were incubated with 20  $\mu$ M CA-074Me or left untreated  
829 for 1 h prior to stimulation with 5  $\mu$ M nigericin, 300  $\mu$ g ml<sup>-1</sup> MSU, 40  $\mu$ M imatinib and 20  $\mu$ M  
830 masitinib for 3 h.

831 (D) LPS-primed wild-type BMDCs were incubated for 1 h with either 15 mM PEG-3000 or 30  
832  $\mu$ M CA-074Me, or left untreated. Cells were subsequently stimulated with 5  $\mu$ M nigericin, 300  
833  $\mu$ g ml<sup>-1</sup> MSU or 40  $\mu$ M imatinib for 3 h.

834 IL-1 $\beta$  secretion and LDH release were determined by ELISA or using a colorimetric assay,  
835 respectively, from cell-free supernatants and data are depicted as mean  $\pm$ SD of technical  
836 triplicates. Results are representative of at least three independent experiments. Multiple  
837 unpaired T-tests were performed for statistical analysis (\*,  $p < 0.05$ ; \*\*,  $p < 0.01$ ; \*\*\*,  $p <$   
838 0.001; n.s., not significant).

839

## NLRP3 activation by TKIs

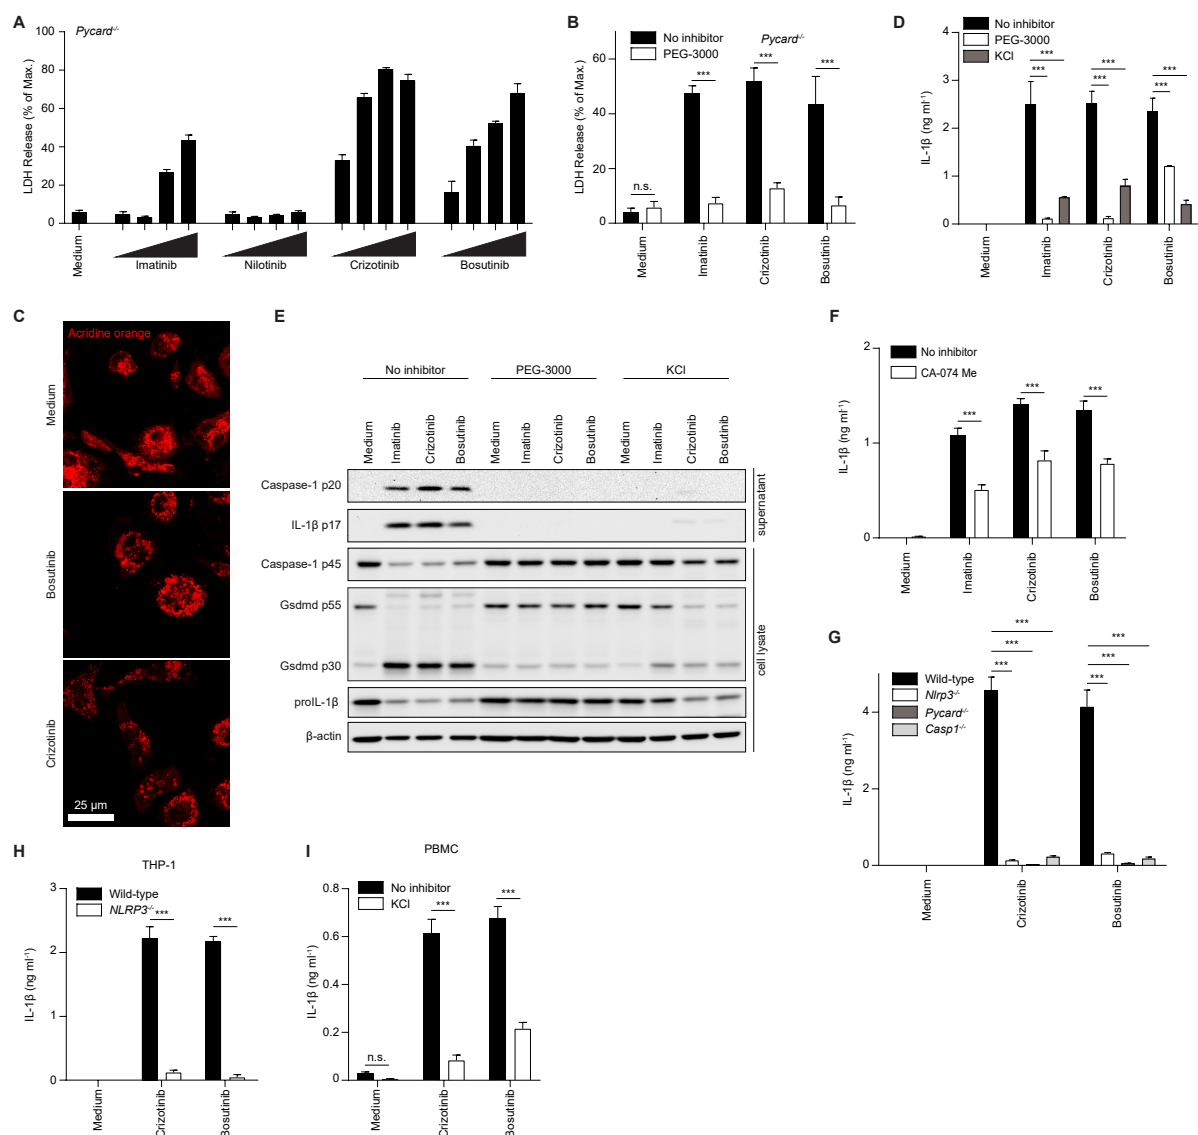

840

### 841 **Fig. 6: Multiple clinically relevant TKIs induce PEG-sensitive myeloid cell death and** 842 **NLRP3 inflammasome activation**

843 (A) LPS-primed ASC-deficient *Pycard*<sup>-/-</sup> BMDCs were stimulated with 10 μM, 20 μM, 40 μM,  
844 and 80 μM of the indicated TKIs for 3 h.

845 (B) LPS-primed ASC-deficient *Pycard*<sup>-/-</sup> BMDCs were incubated with 10 mM PEG-3000 or  
846 medium 30 min prior to stimulation with 40 μM imatinib, 20 μM crizotinib or 20 μM bosutinib  
847 for 3 h.

848 (C) ASC-deficient *Pycard*<sup>-/-</sup> BMDMs were stained with acridine orange and incubated with 15  
849 mM PEG-3000 30 min prior to stimulation with 20 μM crizotinib or 40 μM bosutinib. Cells  
850 were analyzed by fluorescence microscopy after 10 min.

851 (D) and (E) LPS-primed wild-type BMDCs were incubated with 10 mM PEG-3000, 50 mM  
852 KCl or medium 30 min prior to stimulation with 40 μM imatinib, 20 μM crizotinib or 20 μM  
853 bosutinib for 3 h. Cell lysates and supernatants were analyzed by immunoblotting (E).

854 (F) LPS-primed wild-type BMDCs were incubated with 30 μM CA-074Me or left untreated  
855 for 1 h prior to stimulation with 40 μM imatinib, 20 μM crizotinib or 40 μM bosutinib for 4 h.

## NLRP3 activation by TKIs

856 (G) LPS-primed BMDCs from mice of the indicated genotypes were stimulated with 20  $\mu$ M  
857 crizotinib or 20  $\mu$ M bosutinib.

858 (H) THP-1 cells were treated with 200 ng ml<sup>-1</sup> PMA for 3 h, washed and left at 37 °C, 5 % CO<sub>2</sub>  
859 overnight. Cells were then primed with 50 ng ml<sup>-1</sup> LPS for 3 h and stimulated with 40  $\mu$ M  
860 crizotinib or 60  $\mu$ M bosutinib.

861 (I) LPS-primed human PBMCs were incubated with 60 mM KCl or medium 30 min prior to  
862 stimulation with 10  $\mu$ M crizotinib or 20  $\mu$ M bosutinib.

863 IL-1 $\beta$  secretion and LDH release were determined by ELISA or using a colorimetric assay,  
864 respectively, from cell-free supernatants and data are depicted as mean  $\pm$ SD of technical  
865 triplicates. Results are representative of at least three independent experiments. Multiple  
866 unpaired T-tests were performed for statistical analysis (\*,  $p < 0.05$ ; \*\*,  $p < 0.01$ ; \*\*\*,  $p <$

867

## 868 References

869 1. K. Schroder, J. Tschopp, The Inflammasomes, *Cell* **140**, 821–832 (2010).

870 2. P. Broz, V. M. Dixit, Inflammasomes: mechanism of assembly, regulation and signalling,  
871 *Nature Reviews Immunology* **16**, 407–420 (2016).

872 3. H. Guo, J. B. Callaway, J. P. Y. Ting, Inflammasomes: mechanism of action, role in  
873 disease, and therapeutics, *Nature Medicine* **21**, 677–687 (2015).

874 4. F. Martinon, K. Burns, J. Tschopp, The inflammasome: A molecular platform triggering  
875 activation of inflammatory caspases and processing of proIL-beta, **10**, 417–426 (2002).

876 5. T. Fernandes-Alnemri, J. Wu, J.-W. Yu, P. Datta, B. Miller, W. Jankowski, S. Rosenberg,  
877 J. Zhang, E. S. Alnemri, The pyroptosome: a supramolecular assembly of ASC dimers  
878 mediating inflammatory cell death via caspase-1 activation, *Cell Death Differ* **14**, 1590–1604  
879 (2007).

880 6. J. Shi, Y. Zhao, K. Wang, X. Shi, Y. Wang, H. Huang, Y. Zhuang, T. Cai, F. Wang, F.  
881 Shao, Cleavage of GSDMD by inflammatory caspases determines pyroptotic cell death,  
882 *Nature*, 1–17 (2015).

883 7. S. L. Fink, B. T. Cookson, Caspase-1-dependent pore formation during pyroptosis leads to  
884 osmotic lysis of infected host macrophages, *Cell Microbiol* **8**, 1812–1825 (2006).

885 8. O. Groß, A. S. Yazdi, C. J. Thomas, M. Masin, L. X. Heinz, G. Guarda, M. Quadroni, S.  
886 K. Drexler, J. Tschopp, Inflammasome Activators Induce Interleukin-1 $\alpha$ ; Secretion via  
887 Distinct Pathways with Differential Requirement for the Protease Function of Caspase-1,  
888 *Immunity* **36**, 388–400 (2012).

889 9. L. Franchi, A. Amer, M. Body-Malapel, T.-D. Kanneganti, N. Özören, R. Jagirdar, N.  
890 Inohara, P. Vandenabeele, J. Bertin, A. Coyle, E. P. Grant, G. Nuñez, Cytosolic flagellin  
891 requires Ipaf for activation of caspase-1 and interleukin 1 $\beta$  in salmonella-infected  
892 macrophages, *Nat Immunol* **7**, 576–582 (2006).

NLRP3 activation by TKIs

- 893 10. V. Hornung, A. Ablasser, M. Charrel-Dennis, F. Bauernfeind, G. Horvath, D. R. Caffrey,  
894 E. Latz, K. A. Fitzgerald, AIM2 recognizes cytosolic dsDNA and forms a caspase-1-  
895 activating inflammasome with ASC, *Nature* **458**, 514–518 (2009).
- 896 11. A. Sandstrom, P. S. Mitchell, L. Goers, E. W. Mu, C. F. Lesser, R. E. Vance, Functional  
897 degradation: A mechanism of NLRP1 inflammasome activation by diverse pathogen  
898 enzymes, *Science* **364**, 42–+ (2019).
- 899 12. H. Xu, J. Yang, W. Gao, L. Li, P. Li, L. Zhang, Y.-N. Gong, X. Peng, J. J. Xi, S. Chen, F.  
900 Wang, F. Shao, Innate immune sensing of bacterial modifications of Rho GTPases by the  
901 Pyrin inflammasome, *Nature* **513**, 237–241 (2014).
- 902 13. T. Próchnicki, M. S. Mangan, E. Latz, Recent insights into the molecular mechanisms of  
903 the NLRP3 inflammasome activation, *F1000Res* **5**, 1469–15 (2016).
- 904 14. E. Neuwirt, O. Gorka, B. S. Saller, C. J. Groß, T. Madl, O. Groß, NLRP3 as a sensor of  
905 metabolism gone awry, *Curr. Opin. Biotechnol.* **68**, 300–309 (2021).
- 906 15. O. Groß, H. Poeck, M. Bscheider, C. Dostert, N. Hanneschläger, S. Endres, G.  
907 Hartmann, A. Tardivel, E. Schweighoffer, V. Tybulewicz, A. Mócsai, J. Tschopp, J. Ruland,  
908 Syk kinase signalling couples to the Nlrp3 inflammasome for anti-fungal host defence,  
909 *Nature* **459**, 433–436 (2009).
- 910 16. C. J. Groß, R. Mishra, K. S. Schneider, G. Médard, J. Wettmarshausen, D. C. Dittlein, H.  
911 Shi, O. Gorka, P.-A. Koenig, S. Fromm, G. Magnani, T. Ćiković, L. Hartjes, J. Smollich, A.  
912 A. B. Robertson, M. A. Cooper, M. Schmidt-Supprian, M. Schuster, K. Schroder, P. Broz, C.  
913 Traidl-Hoffmann, B. Beutler, B. Kuster, J. Ruland, S. Schneider, F. Perocchi, O. Groß, K+  
914 Efflux-Independent NLRP3 Inflammasome Activation by Small Molecules Targeting  
915 Mitochondria, *Immunity*, 1–31 (2016).
- 916 17. V. Pétrilli, S. Papin, C. Dostert, A. Mayor, F. Martinon, J. Tschopp, Activation of the  
917 NALP3 inflammasome is triggered by low intracellular potassium concentration, *Cell Death*  
918 *Differ* **14**, 1583–1589 (2007).
- 919 18. L. Franchi, T.-D. Kanneganti, G. R. Dubyak, G. Nuñez, Differential requirement of  
920 P2X7 receptor and intracellular K+ for caspase-1 activation induced by intracellular and  
921 extracellular bacteria, *J. Biol. Chem.* **282**, 18810–18818 (2007).
- 922 19. V. Hornung, F. Bauernfeind, A. Halle, E. O. Samstad, H. Kono, K. L. Rock, K. A.  
923 Fitzgerald, E. Latz, Silica crystals and aluminum salts activate the NALP3 inflammasome  
924 through phagosomal destabilization, *Nat Immunol* **9**, 847–856 (2008).
- 925 20. J. Chen, Z. J. Chen, PtdIns4P on dispersed trans-Golgi network mediates NLRP3  
926 inflammasome activation, *Nature Publishing Group*, 1–26 (2018).
- 927 21. Y. He, S. Varadarajan, R. Muñoz-Planillo, A. Burberry, Y. Nakamura, G. Nuñez, 3,4-  
928 methylenedioxy-β-nitrostyrene inhibits NLRP3 inflammasome activation by blocking  
929 assembly of the inflammasome, *Journal of Biological Chemistry* **289**, 1142–1150 (2014).
- 930 22. H. Jiang, H. He, Y. Chen, W. Huang, J. Cheng, J. Ye, A. Wang, J. Tao, C. Wang, Q. Liu,  
931 T. Jin, W. Jiang, X. Deng, R. Zhou, Identification of a selective and direct NLRP3 inhibitor  
932 to treat inflammatory disorders, *Journal of Experimental Medicine* **214**, 3219–3238 (2017).

NLRP3 activation by TKIs

- 933 23. L. Sborgi, J. Ude, M. S. Dick, J. Vesin, M. Chambon, G. Turcatti, P. Broz, S. Hiller,  
934 Assay for high-throughput screening of inhibitors of the ASC-PYD inflammasome core  
935 filament, *CST* **2**, 82–90 (2018).
- 936 24. U. Tran, T. Kitami, Niclosamide activates the NLRP3 inflammasome by intracellular  
937 acidification and mitochondrial inhibition, *Communications Biology*, 1–14 (2019).
- 938 25. M. C. Okondo, S. D. Rao, C. Y. Taabazuing, A. J. Chui, S. E. Poplawski, D. C. Johnson,  
939 D. A. Bachovchin, Inhibition of Dpp8/9 Activates the Nlrp1b Inflammasome, *Cell Chemical*  
940 *Biology* **25**, 262–267.e5 (2018).
- 941 26. K. Gai, M. C. Okondo, S. D. Rao, A. J. Chui, D. P. Ball, D. C. Johnson, D. A.  
942 Bachovchin, DPP8/9 inhibitors are universal activators of functional NLRP1 alleles, *Cell*  
943 *Death and Disease*, 1–10 (2019).
- 944 27. N. M. de Vasconcelos, G. Vliegen, A. Gonçalves, E. De Hert, R. Martín-Pérez, N. Van  
945 Opdenbosch, A. Jallapally, R. Geiss-Friedlander, A.-M. Lambeir, K. Augustyns, P. Van Der  
946 Veken, I. De Meester, M. Lamkanfi, DPP8/DPP9 inhibition elicits canonical Nlrp1b  
947 inflammasome hallmarks in murine macrophages, *Life Sci. Alliance* **2**, e201900313–14  
948 (2019).
- 949 28. A. J. Chui, M. C. Okondo, S. D. Rao, K. Gai, A. R. Griswold, D. C. Johnson, D. P. Ball,  
950 C. Y. Taabazuing, E. L. Orth, B. A. Vittimberga, D. A. Bachovchin, N-terminal degradation  
951 activates the NLRP1B inflammasome, *Science* **364**, 82–+ (2019).
- 952 29. L. R. Hollingsworth, H. Sharif, A. R. Griswold, Pietro Fontana, J. Mintseris, K. B.  
953 Dagbay, J. A. Paulo, S. P. Gygi, D. A. Bachovchin, H. Wu, DPP9 sequesters the C terminus  
954 of NLRP1 to repress inflammasome activation, *Nature*, 1–26 (2021).
- 955 30. F. Martinon, V. Pétrilli, A. Mayor, A. Tardivel, J. Tschopp, Gout-associated uric acid  
956 crystals activate the NALP3 inflammasome, *Nature* **440**, 237–241 (2006).
- 957 31. O. Groß, Measuring the inflammasome, *Methods Mol. Biol.* **844**, 199–222 (2012).
- 958 32. K. S. Schneider, C. J. Groß, R. F. Dreier, B. S. Saller, R. Mishra, O. Gorka, R. Heilig, E.  
959 Meunier, M. S. Dick, T. Ćiković, J. Sodenkamp, G. Médard, R. Naumann, J. Ruland, B.  
960 Kuster, P. Broz, O. Groß, The Inflammasome Drives GSDMD-Independent Secondary  
961 Pyroptosis and IL-1 Release in the Absence of Caspase-1 Protease Activity, *CellReports* **21**,  
962 3846–3859 (2017).
- 963 33. S. M. Canham, Y. Wang, A. Cornett, D. S. Auld, D. K. Baeschlin, M. Patoor, P. R.  
964 Skaanderup, A. Honda, L. Llamas, G. Wendel, F. A. Mapa, P. Aspesi, N. Labbe-Giguere, G.  
965 G. Gamber, D. S. Palacios, A. Schuffenhauer, Z. Deng, F. Nigsch, M. Frederiksen, S. M.  
966 Bushell, D. Rothman, R. K. Jain, H. Hemmerle, K. Briner, J. A. Porter, J. A. Tallarico, J. L.  
967 Jenkins, Systematic Chemogenetic Library Assembly, *Cell Chemical Biology* (2020),  
968 doi:10.1016/j.chembiol.2020.07.004.
- 969 34. J. F. Rodríguez-Alcázar, M. A. Ataide, G. Engels, C. Schmitt-Mabmunyo, N. Garbi, W.  
970 Kastenmüller, E. Latz, B. S. Franklin, Charcot-Leyden Crystals Activate the NLRP3  
971 Inflammasome and Cause IL-1 $\beta$  Inflammation in Human Macrophages, *J. Immunol.* **202**,  
972 550–558 (2019).



NLRP3 activation by TKIs

- 973 35. J. L. Poyet, Identification of Ipaf, a Human Caspase-1-activating Protein Related to Apaf-  
974 1, *Journal of Biological Chemistry* **276**, 28309–28313 (2001).
- 975 36. J. Chavarría-Smith, R. E. Vance, K. A. Bradley, Ed. Direct Proteolytic Cleavage of  
976 NLRP1B Is Necessary and Sufficient for Inflammasome Activation by Anthrax Lethal  
977 Factor, *PLoS Pathog* **9**, e1003452 (2013).
- 978 37. R. C. Coll, J. R. Hill, C. J. Day, A. Zamoshnikova, D. Boucher, N. L. Massey, J. L.  
979 Chitty, J. A. Fraser, M. P. Jennings, A. A. B. Robertson, K. Schroder, MCC950 directly  
980 targets the NLRP3 ATP-hydrolysis motif for inflammasome inhibition, *Nat Chem Biol* **15**,  
981 556–559 (2019).
- 982 38. A. Tapia-Abellán, D. Angosto-Bazarra, H. Martínez-Banaclocha, C. de Torre-Minguela,  
983 J. P. Cerón-Carrasco, H. Pérez-Sánchez, J. I. Arostegui, P. Pelegrín, MCC950 closes the  
984 active conformation of NLRP3 to an inactive state, *Nat Chem Biol* **15**, 560–564 (2019).
- 985 39. S. A. Conos, K. W. Chen, D. De Nardo, H. Hara, L. Whitehead, G. Nuñez, S. L. Masters,  
986 J. M. Murphy, K. Schroder, D. L. Vaux, K. E. Lawlor, L. M. Lindqvist, J. E. Vince, Active  
987 MLKL triggers the NLRP3 inflammasome in a cell-intrinsic manner, *Proc. Natl. Acad. Sci.*  
988 *U.S.A.*, 201613305–16 (2017).
- 989 40. N. Kayagaki, S. Warming, M. Lamkanfi, L. V. Walle, S. Louie, J. Dong, K. Newton, Y.  
990 Qu, J. Liu, S. Heldens, J. Zhang, W. P. Lee, M. Roose-Girma, V. M. Dixit, Non-canonical  
991 inflammasome activation targets caspase-11, *Nature* **479**, 117–121 (2011).
- 992 41. S. Rühl, P. Broz, Caspase-11 activates a canonical NLRP3 inflammasome by promoting  
993 K(+) efflux, *Eur. J. Immunol.* **45**, 2927–2936 (2015).
- 994 42. C. Rogers, D. A. Erkes, A. Nardone, A. E. Aplin, T. Fernandes-Alnemri, E. S. Alnemri,  
995 Gasdermin pores permeabilize mitochondria to augment caspase-3 activation during  
996 apoptosis and inflammasome activation, *Nature Communications*, 1–17 (2019).
- 997 43. I. Shlomovitz, M. Speir, M. Gerlic, Flipping the dogma - phosphatidylserine in non-  
998 apoptotic cell death, *Cell Commun Signal* **17**, 139–12 (2019).
- 999 44. R. Palchaudhuri, M. J. Lambrecht, R. C. Botham, K. C. Partlow, T. J. van Ham, K. S.  
1000 Putt, L. T. Nguyen, S.-H. Kim, R. T. Peterson, T. M. Fan, P. J. Hergenrother, A Small  
1001 Molecule that Induces Intrinsic Pathway Apoptosis with Unparalleled Speed, *CellReports*, 1–  
1002 11 (2015).
- 1003 45. O. Goldmann, I. Sastalla, M. Wos-Oxley, M. Rohde, E. Medina, *Streptococcus pyogenes*  
1004 induces oncosis in macrophages through the activation of an inflammatory programmed cell  
1005 death pathway, *Cell Microbiol* **11**, 138–155 (2009).
- 1006 46. J. Brojatsch, H. Lima, A. K. Kar, L. S. Jacobson, S. M. Muehlbauer, K. Chandran, F.  
1007 Diaz-Griffero, T. Frisan, Ed. A Proteolytic Cascade Controls Lysosome Rupture and Necrotic  
1008 Cell Death Mediated by Lysosome-Destabilizing Adjuvants, *PLoS ONE* **9**, e95032 (2014).
- 1009 47. G. M. Orłowski, S. Sharma, J. D. Colbert, M. Bogyo, S. A. Robertson, H. Kataoka, F. K.  
1010 Chan, K. L. Rock, Frontline Science: Multiple cathepsins promote inflammasome-  
1011 independent, particle-induced cell death during NLRP3-dependent IL-1 $\beta$  activation, *Journal*  
1012 *of Leukocyte Biology* **102**, 7–17 (2017).

NLRP3 activation by TKIs

- 1013 48. P. Dubreuil, S. Letard, M. Ciufolini, L. Gros, M. Humbert, N. Castéran, L. Borge, B.  
1014 Hajem, A. Lermet, W. Sippl, E. Voisset, M. Arock, C. Auclair, P. S. Leventhal, C. D.  
1015 Mansfield, A. Moussy, O. Hermine, J. A. Bauer, Ed. Masitinib (AB1010), a Potent and  
1016 Selective Tyrosine Kinase Inhibitor Targeting KIT, *PLoS ONE* **4**, e7258–12 (2009).
- 1017 49. H. M. Kantarjian, F. Giles, N. Gattermann, K. Bhalla, G. Alimena, F. Palandri, G. J.  
1018 Ossenkoppelle, F.-E. Nicolini, S. G. O'Brien, M. Litzow, R. Bhatia, F. Cervantes, A. Haque,  
1019 Y. Shou, D. J. Resta, A. Weitzman, A. Hochhaus, P. le Coutre, Nilotinib (formerly  
1020 AMN107), a highly selective BCR-ABL tyrosine kinase inhibitor, is effective in patients with  
1021 Philadelphia chromosome–positive chronic myelogenous leukemia in chronic phase  
1022 following imatinib resistance and intolerance, *Blood* **110**, 3540–3546 (2007).
- 1023 50. J. L. Schmid-Burgk, D. Chauhan, T. Schmidt, T. S. Ebert, J. Reinhardt, E. Endl, V.  
1024 Hornung, A Genome-wide CRISPR (Clustered Regularly Interspaced Short Palindromic  
1025 Repeats) Screen Identifies NEK7 as an Essential Component of NLRP3 Inflammasome  
1026 Activation, *J. Biol. Chem.* **291**, 103–109 (2016).
- 1027 51. S. Hamarsheh, R. Zeiser, NLRP3 Inflammasome Activation in Cancer: A Double-Edged  
1028 Sword, *Front. Immunol.* **11**, 1444 (2020).
- 1029 52. S. Dan, M. Naito, T. Tsuruo, Selective induction of apoptosis in Philadelphia  
1030 chromosome-positive chronic myelogenous leukemia cells by an inhibitor of BCR - ABL  
1031 tyrosine kinase, CGP 57148, *Cell Death Differ* **5**, 710–715 (1998).
- 1032 53. C. Gambacorti-Passerini, P. le Coutre, L. Mologni, M. Fanelli, C. Bertazzoli, E.  
1033 Marchesi, M. Di Nicola, A. Biondi, G. M. Corneo, D. Belotti, E. Pogliani, N. B. Lydon,  
1034 Inhibition of the ABL kinase activity blocks the proliferation of BCR/ABL+ leukemic cells  
1035 and induces apoptosis, *Blood Cells Mol. Dis.* **23**, 380–394 (1997).
- 1036 54. Y. Kamitsuji, J. Kuroda, S. Kimura, S. Toyokuni, K. Watanabe, E. Ashihara, H. Tanaka,  
1037 Y. Yui, M. Watanabe, H. Matsubara, Y. Mizushima, Y. Hiraumi, E. Kawata, T. Yoshikawa,  
1038 T. Maekawa, T. Nakahata, S. Adachi, The Bcr-Abl kinase inhibitor INNO-406 induces  
1039 autophagy and different modes of cell death execution in Bcr-Abl-positive leukemias, *Cell*  
1040 *Death Differ* **15**, 1712–1722 (2008).
- 1041 55. V. J. Lavallard, L. A. Pradelli, A. Paul, M. Beneteau, A. Jacquet, P. Auberger, J. E. Ricci,  
1042 Modulation of Caspase-Independent Cell Death Leads to Resensitization of Imatinib  
1043 Mesylate-Resistant Cells, *Cancer Research* **69**, 3013–3020 (2009).
- 1044 56. M. Okada, S. Adachi, T. Imai, K.-I. Watanabe, S.-Y. Toyokuni, M. Ueno, A. S. Zervos,  
1045 G. Kroemer, T. Nakahata, A novel mechanism for imatinib mesylate–induced cell death of  
1046 BCR-ABL–positive human leukemic cells: caspase-independent, necrosis-like programmed  
1047 cell death mediated by serine protease activity, *Blood* **103**, 2299–2307 (2004).
- 1048 57. C. Yu, G. Krystal, L. Varticovski, R. McKinstry, M. Rahmani, P. Dent, S. Grant,  
1049 Pharmacologic mitogen-activated protein/extracellular signal-regulated kinase  
1050 kinase/mitogen-activated protein kinase inhibitors interact synergistically with STI571 to  
1051 induce apoptosis in Bcr/Abl-expressing human leukemia cells, *Cancer Research* **62**, 188–199  
1052 (2002).



NLRP3 activation by TKIs

- 1053 58. M. I. Davis, J. P. Hunt, S. Herrgard, P. Ciceri, L. M. Wodicka, G. Pallares, M. Hocker, D.  
1054 K. Treiber, P. P. Zarrinkar, Comprehensive analysis of kinase inhibitor selectivity, *Nature*  
1055 *Biotechnology* **29**, 1046–1051 (2011).
- 1056 59. M. Bantscheff, D. Eberhard, Y. Abraham, S. Bastuck, M. Boesche, S. Hobson, T.  
1057 Mathieson, J. Perrin, M. Raida, C. Rau, V. Reader, G. Sweetman, A. Bauer, T. Bouwmeester,  
1058 C. Hopf, U. Kruse, G. Neubauer, N. Ramsden, J. Rick, B. Kuster, G. Drewes, Quantitative  
1059 chemical proteomics reveals mechanisms of action of clinical ABL kinase inhibitors, *Nature*  
1060 *Biotechnology* **25**, 1035–1044 (2007).
- 1061 60. U. Rix, O. Hantschel, G. Dürnberger, L. L. Remsing Rix, M. Planyavsky, N. V. Fernbach,  
1062 I. Kaupe, K. L. Bennett, P. Valent, J. Colinge, T. Köcher, G. Superti-Furga, Chemical  
1063 proteomic profiles of the BCR-ABL inhibitors imatinib, nilotinib, and dasatinib reveal novel  
1064 kinase and nonkinase targets, *Blood* **110**, 4055–4063 (2007).
- 1065 61. S. Klaeger, S. Heinzlmeir, M. Wilhelm, H. Polzer, B. Vick, P.-A. Koenig, M. Reinecke,  
1066 B. Ruprecht, S. Petzoldt, C. Meng, J. Zecha, K. Reiter, H. Qiao, D. Helm, H. Koch, M.  
1067 Schoof, G. Canevari, E. Casale, S. R. Depaolini, A. Feuchtinger, Z. Wu, T. Schmidt, L.  
1068 Rueckert, W. Becker, J. Huenges, A.-K. Garz, B.-O. Gohlke, D. P. Zolg, G. Kayser, T.  
1069 Vooder, R. Preissner, H. Hahne, N. Tönisson, K. Kramer, K. Götze, F. Bassermann, J.  
1070 Schlegl, H.-C. Ehrlich, S. Aiche, A. Walch, P. A. Greif, S. Schneider, E. R. Felder, J. Ruland,  
1071 G. Médard, I. Jeremias, K. Spiekermann, B. Kuster, The target landscape of clinical kinase  
1072 drugs, *Science* **358**, eaan4368–18 (2017).
- 1073 62. B. Chapuy, M. Panse, U. Radunski, R. Koch, D. Wenzel, N. Inagaki, D. Haase, L.  
1074 Truemper, G. G. Wulf, ABC transporter A3 facilitates lysosomal sequestration of imatinib  
1075 and modulates susceptibility of chronic myeloid leukemia cell lines to this drug,  
1076 *Haematologica* **94**, 1528–1536 (2009).
- 1077 63. D. Fu, J. Zhou, W. S. Zhu, P. W. Manley, Y. K. Wang, T. Hood, A. Wylie, X. S. Xie,  
1078 Imaging the intracellular distribution of tyrosine kinase inhibitors in living cells with  
1079 quantitative hyperspectral stimulated Raman scattering, *Nat Chem* **6**, 614–622 (2014).
- 1080 64. C. de Duve, T. de Barsey, B. Poole, A. Trouet, P. Tulkens, F. Van Hoof, Commentary.  
1081 Lysosomotropic agents, *Biochemical Pharmacology* **23**, 2495–2531 (1974).
- 1082 65. A. M. Villamil Giraldo, H. Appelqvist, T. Ederth, K. Öllinger, Lysosomotropic agents:  
1083 impact on lysosomal membrane permeabilization and cell death, *Biochem Soc Trans* **42**,  
1084 1460–1464 (2014).
- 1085 66. J. Brojatsch, H. Lima, D. Palliser, L. S. Jacobson, S. M. Muehlbauer, R. Furtado, D. L.  
1086 Goldman, M. P. Lisanti, K. Chandran, Distinct cathepsins control necrotic cell death  
1087 mediated by pyroptosis inducers and lysosome-destabilizing agents, *cc* **14**, 964–972 (2015).
- 1088 67. S. Appel, S. Balabanov, T. H. Brümmendorf, P. Brossart, Effects of imatinib on normal  
1089 hematopoiesis and immune activation, *Stem Cells* **23**, 1082–1088 (2005).
- 1090 68. J. T. Hartmann, M. Haap, H.-G. Kopp, H.-P. Lipp, Tyrosine kinase inhibitors - a review  
1091 on pharmacology, metabolism and side effects, *Curr. Drug Metab.* **10**, 470–481 (2009).
- 1092 69. L. Zitvogel, S. Rusakiewicz, B. Routy, M. Ayyoub, G. Kroemer, Immunological off-  
1093 target effects of imatinib, *Nature Publishing Group*, 1–16 (2016).

NLRP3 activation by TKIs

- 1094 70. L. Arranz, M. D. M. Arriero, A. Villatoro, Interleukin-1 $\beta$  as emerging therapeutic target  
1095 in hematological malignancies and potentially in their complications, *Blood Reviews* **31**, 306–  
1096 317 (2017).
- 1097 71. H. Ågerstam, N. Hansen, S. von Palffy, C. Sandén, K. Reckzeh, C. Karlsson, H.  
1098 Lilljebjörn, N. Landberg, M. Askmyr, C. Högborg, M. Rissler, K. Porkka, H. Wadenvik, S.  
1099 Mustjoki, J. Richter, M. Järås, T. Fioretos, IL1RAP antibodies block IL-1–induced expansion  
1100 of candidate CML stem cells and mediate cell killing in xenograft models, *Blood* **128**, 2683–  
1101 2693 (2016).
- 1102 72. C.-R. Lee, J.-A. Kang, H.-E. Kim, Y. Choi, T. Yang, S.-G. Park, Z. Chang, Ed. Secretion  
1103 of IL-1 $\beta$  from imatinib-resistant chronic myeloid leukemia cells contributes to BCR-  
1104 ABLmutation-independent imatinib resistance, *FEBS Letters* **590**, 358–368 (2016).
- 1105 73. D. White, V. Saunders, A. B. Lyons, S. Branford, A. Grigg, L. B. To, T. Hughes, In vitro  
1106 sensitivity to imatinib-induced inhibition of ABL kinase activity is predictive of molecular  
1107 response in patients with de novo CML, *Blood* **106**, 2520–2526 (2005).
- 1108 74. E. Weisberg, P. W. Manley, W. Breitenstein, J. Brüggén, S. W. Cowan-Jacob, A. Ray, B.  
1109 Huntly, D. Fabbro, G. Fendrich, E. Hall-Meyers, A. L. Kung, J. Mestan, G. Q. Daley, L.  
1110 Callahan, L. Catley, C. Cavazza, M. Azam, A. Mohammed, D. Neuberg, R. D. Wright, D. G.  
1111 Gilliland, J. D. Griffin, Characterization of AMN107, a selective inhibitor of native and  
1112 mutant Bcr-Abl, *Cancer Cell* **7**, 129–141 (2005).
- 1113 75. P. Herviou, E. Thivat, D. Richard, L. Roche, J. Dohou, M. Pouget, A. Eschalier, X.  
1114 Durando, N. Authier, Therapeutic drug monitoring and tyrosine kinase inhibitors, *Oncology*  
1115 *Letters* **12**, 1223–1232 (2016).
- 1116 76. Bin Peng, P. Lloyd, H. Schran, Clinical Pharmacokinetics of Imatinib, *Clin*  
1117 *Pharmacokinet* **44**, 879–894 (2005).
- 1118 77. S. Mariathasan, D. S. Weiss, K. Newton, J. McBride, K. O'Rourke, M. Roose-Girma, W.  
1119 P. Lee, Y. Weinrauch, D. M. Monack, V. M. Dixit, Cryopyrin activates the inflammasome in  
1120 response to toxins and ATP, *Nature* **440**, 228–232 (2006).
- 1121 78. K. Kuida, J. A. Lippke, G. Ku, M. W. Harding, D. J. Livingston, M. Su, R. A. Flavell,  
1122 Altered Cytokine Export and Apoptosis in Mice Deficient in Interleukin-1-Beta Converting-  
1123 Enzyme, *Science* **267**, 2000–2003 (1995).
- 1124 79. T.-C. J. Tzeng, S. Schattgen, B. Monks, D. Wang, A. Cerny, E. Latz, K. Fitzgerald, D. T.  
1125 Golenbock, A Fluorescent Reporter Mouse for Inflammasome Assembly Demonstrates an  
1126 Important Role for Cell-Bound and Free ASC Specks during In&nbsp;Vivo Infection,  
1127 *CellReports*, 1–22 (2016).
- 1128 80. K. S. Schneider, C. J. Thomas, O. Groß, in *Methods in Molecular Biology*, Methods in  
1129 Molecular Biology. (Humana Press, Totowa, NJ, 2013), vol. 1040, pp. 117–135.
